# Supplementary material for: Adverse events associated with the use of cannabis-based products in people living with cancer: a systematic scoping review
Source: Springer Nature journal article supplement (doi:10.1007/s00520-024-09087-w), 2024-12-18
Supplement: MOESM4 [file 520_2024_9087_MOESM4_ESM.pdf]

## S4. Data Extraction Template

### ARTICLE INFORMATION

Study ID (e.g. Last Name, Year)

Citation details

Country of study

(select all that apply)

1. Australia
2. Canada
3. Israel
4. New Zealand
5. UK
6. US
7. Other

### DECLARATIONS

Was funding and interests declared?

1. Funding & interests declared
2. Funding declared; interests not declared
3. Interests declared; funding not declared
4. Not declared

Details if funding declared

(write: declared no funding or provide details)

Details if interests declared

(write: declared no interest or provide details)

### STUDY CHARACTERISTICS

Study design

1. Randomised controlled trial
2. Non-randomised controlled trial
3. Case-control study
4. Longitudinal cohort study
5. Cross-sectional survey
6. Retrospective chart review
7. Single-arm observational study (prospective)
8. Case series
9. Case report
10. Other

**Indication of CBP or condition studied for cancer population**

(select all that apply)

1. General/cancer care (non-specific symptoms)
2. Anorexia
3. Cachexia
4. Cancer pain
5. Fatigue
6. Insomnia
7. Mental health (anxiety, depression etc)
8. Nausea and vomiting
9. Neuropathy
10. Seizures
11. Other

**PATIENT CHARACTERISTICS**

**Number of participants on CBP**

(number who received at least 1 dose of CBP)

**Number of participants in comparison group**

**Age group**

(select all that apply)

1. Infant (below 1 year)

2. Child (1-17 years)
3. Adult (18-64 years)
4. Elderly (65 years and above)
5. Unknown

### Gender

(select all that apply)

1. Not reported
2. Men/boys
3. Women/girls
4. Other

### Ethnicity

1. Not reported
2. Other

### Cancer diagnosis

(select all that apply)

1. Not reported
2. General
3. Breast
4. Endocrine
5. Gastrointestinal, liver
6. Gynaecological
7. Haematological
8. Head/neck
9. Lung
10. Neurological
11. Skin
12. Urogenital
13. Other

### Cancer stage

1. Not reported
2. Mixed
3. Early
4. Advanced

### Comorbidities

1. Not reported
2. No
3. Yes (details not provided)
4. Yes

### Details about comorbidities

#### Prior experience with CBP

1. Not reported
2. Yes
3. No
4. Mixed
5. Other

#### Exclusion criteria of populations with an increased risk of AEs:

(select all that apply)

1. N/A
2. Not reported
3. Neurological
4. Psychiatric
5. Cardiovascular
6. History or current drug/alcohol/tobacco use
7. Renal
8. Hepatic
9. Other

## INTERVENTIONS

### CBP Intervention

#### CBP ingredient

(select all that apply)

1. Not reported

2. THC
3. Delta-8-THC
4. CBD
5. High THC:CBD
6. High CBD:THC
7. Balanced THC: CBD
8. Dronabinol
9. Levonantradol
10. Nabilone
11. Sativex
12. Other

**CBP form/type**

(select all that apply)

1. Not reported
2. Bud
3. Inflorescence/flower
4. Plant
5. Capsule
6. Cigarette
7. Oil
8. Oral solution
9. Spray
10. Syrup
11. Tablet
12. Tincture
13. Topical agent
14. Injection
15. Infusion
16. Other

**CBP route of administration**

(select all that apply)

1. Oral
2. Inhaled/vaporised

3. Topical
4. Enteral
5. Oromucosal
6. Smoking
7. Sublingual
8. IM
9. IV
10. Other

**CBP dose**

**CBP duration of use**

**Details about CBP intervention**

### **Comparator Intervention**

**Comparator ONE ingredient**

(select all that apply)

1. Not reported
2. None
3. Placebo
4. Chlorpromazine
5. Dexamethasone
6. Dimenhydrinate
7. Diphenhydramine
8. Domperidone
9. Levomepromazine
10. Levonantradol
11. Metoclopramide
12. Prochlorperazine
13. Thiethylperazine
14. Triflupromazine
15. Other

**Comparator ONE form/type**

(select all that apply)

1. Capsule
2. Infusion
3. Injection
4. Patch
5. Solution
6. Tablet
7. Other

**Comparator ONE route of administration**

(select all that apply)

1. Oral
2. IM
3. IV
4. Topical
5. Other

**Comparator ONE dose**

**Comparator ONE duration of use**

**Comparator TWO ingredient**

1. Placebo
2. Chlorpromazine
3. Dexamethasone
4. Diphenhydramine
5. Domperidone
6. Levonatrado]
7. Metoclopramide
8. Prochlorperazine
9. Thiethylperazine
10. Other

**Comparator TWO form/type**

1. Capsule
2. Infusion
3. Injection
4. Patch
5. Solution

- 6.
- 7.

**Comparator TWO route of administration**

- 1.
- 2.
- 3.
- 4.
- 5.

**Comparator TWO dose**

**Comparator TWO duration of use**

**Details about comparator intervention**

**Concomitant Intervention**

**Concomitant Intervention**

(select all that apply)

- 1.
- 2.
- 3.
- 4.
- 5.
- 6.
- 7.
- 8.
- 9.
- 10.
- 11.
- 12.
- 13.
- 14.
- 15.

**Details about concomitant intervention**

|   | Ingredients | Dosage Regimen |
|---|-------------|----------------|
| 1 |             |                |
| 2 |             |                |
| 3 |             |                |
| 4 |             |                |
| 5 |             |                |
| 6 |             |                |
| 7 |             |                |
| 8 |             |                |

**Details about recreational drug/tobacco/alcohol use**

1. Not reported
2. None
3. Other

**ADVERSE EVENTS**

**How AEs were reported**

(select all that apply)

1. HCP (medical practitioner/physician/nurse)
2. Participant
3. Research staff (investigator/trial nurse)
4. Questionnaire
5. Phone call
6. Visit
7. Other

**How AEs were graded**

(select all that apply)

1. Not graded
2. CTCAE grading
3. Non-serious/serious
4. Non-specific (e.g. mild/moderate/severe)
5. Other

**Details about AEs**

|   | <b>AE</b> | <b>Number of AEs</b> | <b>Number of patients with AE (% patients)</b> | <b>Total number of patients</b> | <b>Category and severity (CTCAE grading)</b> | <b>Timepoint of occurrence after commencement of CBP</b> | <b>Outcome (including withdrawal/discontinuation, impact on QoL due to AEs)</b> | <b>Other details (e.g. patient details, causality, risk of AE e.g. RR, AR, OR)</b> |
|---|-----------|----------------------|------------------------------------------------|---------------------------------|----------------------------------------------|----------------------------------------------------------|---------------------------------------------------------------------------------|------------------------------------------------------------------------------------|
| 1 |           |                      |                                                |                                 |                                              |                                                          |                                                                                 |                                                                                    |
| 2 |           |                      |                                                |                                 |                                              |                                                          |                                                                                 |                                                                                    |
| 3 |           |                      |                                                |                                 |                                              |                                                          |                                                                                 |                                                                                    |
| 4 |           |                      |                                                |                                 |                                              |                                                          |                                                                                 |                                                                                    |
| 5 |           |                      |                                                |                                 |                                              |                                                          |                                                                                 |                                                                                    |
| 6 |           |                      |                                                |                                 |                                              |                                                          |                                                                                 |                                                                                    |
| 7 |           |                      |                                                |                                 |                                              |                                                          |                                                                                 |                                                                                    |
| 8 |           |                      |                                                |                                 |                                              |                                                          |                                                                                 |                                                                                    |
| 9 |           |                      |                                                |                                 |                                              |                                                          |                                                                                 |                                                                                    |

|           | <b>AE</b> | <b>Number of AEs</b> | <b>Number of patients with AE (% patients)</b> | <b>Total number of patients</b> | <b>Category and severity (CTCAE grading)</b> | <b>Timepoint of occurrence after commencement of CBP</b> | <b>Outcome (including withdrawal/discontinuation, impact on QoL due to AEs)</b> | <b>Other details (e.g. patient details, causality, risk of AE e.g. RR, AR, OR)</b> |
|-----------|-----------|----------------------|------------------------------------------------|---------------------------------|----------------------------------------------|----------------------------------------------------------|---------------------------------------------------------------------------------|------------------------------------------------------------------------------------|
| <b>10</b> |           |                      |                                                |                                 |                                              |                                                          |                                                                                 |                                                                                    |
| <b>11</b> |           |                      |                                                |                                 |                                              |                                                          |                                                                                 |                                                                                    |
| <b>12</b> |           |                      |                                                |                                 |                                              |                                                          |                                                                                 |                                                                                    |
| <b>13</b> |           |                      |                                                |                                 |                                              |                                                          |                                                                                 |                                                                                    |
| <b>14</b> |           |                      |                                                |                                 |                                              |                                                          |                                                                                 |                                                                                    |
| <b>15</b> |           |                      |                                                |                                 |                                              |                                                          |                                                                                 |                                                                                    |
| <b>16</b> |           |                      |                                                |                                 |                                              |                                                          |                                                                                 |                                                                                    |
| <b>17</b> |           |                      |                                                |                                 |                                              |                                                          |                                                                                 |                                                                                    |
| <b>18</b> |           |                      |                                                |                                 |                                              |                                                          |                                                                                 |                                                                                    |
| <b>19</b> |           |                      |                                                |                                 |                                              |                                                          |                                                                                 |                                                                                    |
| <b>20</b> |           |                      |                                                |                                 |                                              |                                                          |                                                                                 |                                                                                    |

If more than 20 AEs – write details here

Further details about AEs

**AUTHOR'S CONCLUSION**
