# Supplementary material for: Adverse events associated with the use of cannabis-based products in people living with cancer: a systematic scoping review
Source: Springer Nature journal article supplement (doi:10.1007/s00520-024-09087-w), 2024-12-18
Supplement: MOESM5 [file 520_2024_9087_MOESM5_ESM.pdf]

55. Excluded Articles

| Authors                                                                                                                                                                                                                                                                                                          | Title                                                                                                                                                                       | Journal                                           | Published Year | Volume | Issue        | Pages            | DOI                                                                                                               | Exclusion Reason                                |
|------------------------------------------------------------------------------------------------------------------------------------------------------------------------------------------------------------------------------------------------------------------------------------------------------------------|-----------------------------------------------------------------------------------------------------------------------------------------------------------------------------|---------------------------------------------------|----------------|--------|--------------|------------------|-------------------------------------------------------------------------------------------------------------------|-------------------------------------------------|
| Nathan, Rachel; Mupamombe, Charles T; Elbol, John; Case, Amy A; Smith, Danielle; Hyland, Andrew; Attwood, Kristopher; Hansen, Eric D                                                                                                                                                                             | Assessing Efficacy and Use Patterns of Medical Cannabis for Symptom Management in Elderly Cancer Patients.                                                                  | The American journal of hospice & palliative care | 2023           | 40     | 4            | 368-373          | <a href="https://dx.doi.org/10.1177/10499091221110217">https://dx.doi.org/10.1177/10499091221110217</a>           | No information about AEs for cancer population. |
| Hatlinan, Christine M; Gunn, Jane M; Bonomo, Yvonne A                                                                                                                                                                                                                                                            | Use of electronic medical records to monitor the safe and effective prescribing of medicinal cannabis: is it feasible?.                                                     | Australian journal of primary health              | 2022           | 28     | 6            | 564-572          | <a href="https://dx.doi.org/10.1071/PY22054">https://dx.doi.org/10.1071/PY22054</a>                               | No information about AEs for cancer population. |
| Assanangkornchai, Sawitri; Thaika, Kanitha; Talek, Muhammadfahmee; Saingam, Darika                                                                                                                                                                                                                               | Medical cannabis use in Thailand after its legalization: a respondent-driven sample survey.                                                                                 | PeerJ                                             | 2022           | 10     | 101603425    | e12809           | <a href="https://dx.doi.org/10.7717/peerj.12809">https://dx.doi.org/10.7717/peerj.12809</a>                       | No information about AEs for cancer population. |
| HaGani, Neta; Sznitman, Sharon; Dor, Michael; Bar-Sela, Gil; Oren, Dana; Margolis-Dorfman, Lilia; Goor-Aryeh, Itay; Green, Manfred S                                                                                                                                                                             | Attitudes Toward the Use of Medical Cannabis and the Perceived Efficacy, Side-effects and Risks: A Survey of Patients, Nurses and Physicians.                               | Journal of psychoactive drugs                     | 2022           | 54     | 5            | 393-402          | <a href="https://dx.doi.org/10.1080/002791072.2021.2009598">https://dx.doi.org/10.1080/002791072.2021.2009598</a> | No information about AEs for cancer population. |
| Kalonji, Pauline; Revol, Aurelie; Broers, Barbara; Ljuslin, Michael; Pautex, Sophie                                                                                                                                                                                                                              | Patient-Related Barriers to the Prescription of Cannabinoid-Based Medicines in Palliative Care: A Qualitative Approach.                                                     | Palliative medicine reports                       | 2022           | 3      | 1            | 200-205          | <a href="https://dx.doi.org/10.1089/pmr.2022.0021">https://dx.doi.org/10.1089/pmr.2022.0021</a>                   | No information about AEs for cancer population. |
| Laborada, Jennifer; Cohen, Philip R                                                                                                                                                                                                                                                                              | Cutaneous Squamous Cell Carcinoma and Lichen Simplex Chronicus Successfully Treated with Topical Cannabinoid Oil: A Case Report and Summary of Cannabinoids in Dermatology. | Cureus                                            | 2022           | 14     | 4            | e23850           | <a href="https://dx.doi.org/10.7759/cureus.23850">https://dx.doi.org/10.7759/cureus.23850</a>                     | Wrong study design (not primary data).          |
| Bar-Lev Schleider, Lih; Mechoulam, Raphael; Sikorin, Inbal; Naftali, Timna; Novack, Victor                                                                                                                                                                                                                       | Adherence, Safety, and Effectiveness of Medical Cannabis and Epidemiological Characteristics of the Patient Population: A Prospective Study.                                | Frontiers in medicine                             | 2022           | 9      | 101648047    | 827849           | <a href="https://dx.doi.org/10.3389/fmed.2022.827849">https://dx.doi.org/10.3389/fmed.2022.827849</a>             | No information about AEs for cancer population. |
| Nimalan, Devaki; Kawka, Michal; Erridge, Simon; Ergisi, Mehmet; Harris, Michael; Salazar, Oliver; Ali, Rayyan; Loupasaki, Katerina; Holvey, Carl; Coomber, Ross; Platt, Michael; Rucker, James J; Khan, Shaheen; Sodergren, Mikael H                                                                             | UK Medical Cannabis Registry palliative care patients cohort: initial experience and outcomes.                                                                              | Journal of cannabis research                      | 2022           | 4      | 1            | 3                | <a href="https://dx.doi.org/10.1186/s42238-021-00114-9">https://dx.doi.org/10.1186/s42238-021-00114-9</a>         | No information about AEs for cancer population. |
| Meghani, Salimah H; Quinn, Ryan; Ashare, Rebecca; Levoy, Kristin; Worster, Brooke; Naylor, Mary; Chittams, Jesse; Cheattle, Martin                                                                                                                                                                               | Impact of Cannabis Use on Least Pain Scores Among African American and White Patients with Cancer Pain: A Moderation Analysis.                                              | Journal of pain research                          | 2021           | 14     | 101540514    | 3493-3502        | <a href="https://dx.doi.org/10.2147/JPR.S332447">https://dx.doi.org/10.2147/JPR.S332447</a>                       | No information about AEs for cancer population. |
| Waissengrin, Baritz; Mirelman, Dan; Pelles, Sharon; Bukstein, Felix; Blumenthal, Deborah T; Wolf, Ido; Geva, Ravit                                                                                                                                                                                               | Effect of cannabis on oxaliplatin-induced peripheral neuropathy among oncology patients: a retrospective analysis.                                                          | Therapeutic advances in medical oncology          | 2021           | 13     | 101510808    | 1758835921990203 | <a href="https://dx.doi.org/10.1177/1758835921990203">https://dx.doi.org/10.1177/1758835921990203</a>             | No information about AEs for cancer population. |
| Gulbransen, Graham; Xu, William; Arroll, Bruce                                                                                                                                                                                                                                                                   | Cannabidiol prescription in clinical practice: an audit on the first 400 patients in New Zealand.                                                                           | BJGP open                                         | 2020           | 4      | 1            | 1                | <a href="https://dx.doi.org/10.3399/bjgpopen20X101010">https://dx.doi.org/10.3399/bjgpopen20X101010</a>           | No information about AEs for cancer population. |
| Wongkongdech, Rane; Pansila, Narisara; Nonetoom, Pichit; Turnbul, Niruwan; Wongkongdech, Adisorn                                                                                                                                                                                                                 | Symptom Management and Quality of Life of Palliative Cancer Patients After Being Administered with Thai Medicinal Cannabis.                                                 | Studies in health technology and informatics      | 2022           | 295    | ck1, 9214582 | 450-453          | <a href="https://dx.doi.org/10.3233/SHTI220762">https://dx.doi.org/10.3233/SHTI220762</a>                         | No information about AEs for cancer population. |
| Weiss, Marisa C; Hibbs, Julianne E; Buckley, Meghan E; Danese, Sherry R; Leitenberger, Adam; Bollmann-Jenkins, Melissa; Meske, Sam W; Aliano-Ruiz, Katherine E; McHugh, Theresa W; Larson, Sharon L; Le, Elaine H; Green, Nancy L; Gilman, Paul B; Kaktamani, Virginia G; Chlebowski, Rowan T; Martinez, Diana M | A Coala-T-Cannabis Survey Study of breast cancer patients' use of cannabis before, during, and after treatment.                                                             | Cancer                                            | 2022           | 128    | 1            | 160-168          | <a href="https://dx.doi.org/10.1002/cncr.33906">https://dx.doi.org/10.1002/cncr.33906</a>                         | No information about AEs for cancer population. |
| Russo, Ethan B; Cuttler, Carrie; Cooper, Ziva D; Stueber, Amanda; Whiteley, Venetia L; Sexton, Michelle                                                                                                                                                                                                          | Survey of Patients Employing Cannabigerol-Predominant Cannabis Preparations: Perceived Medical Effects, Adverse Events, and Withdrawal Symptoms.                            | Cannabis and cannabinoid research                 | 2022           | 7      | 5            | 706-716          | <a href="https://dx.doi.org/10.1089/can.2021.0058">https://dx.doi.org/10.1089/can.2021.0058</a>                   | No information about AEs for cancer population. |

55. Excluded Articles

| Authors                                                                                                                                                           | Title                                                                                                                                                                                                                                                           | Journal                                                                                                                             | Published Year | Volume | Issue | Pages        | DOI                                                                                                       | Exclusion Reason                                                                                                       |
|-------------------------------------------------------------------------------------------------------------------------------------------------------------------|-----------------------------------------------------------------------------------------------------------------------------------------------------------------------------------------------------------------------------------------------------------------|-------------------------------------------------------------------------------------------------------------------------------------|----------------|--------|-------|--------------|-----------------------------------------------------------------------------------------------------------|------------------------------------------------------------------------------------------------------------------------|
| Wiseman, Luke K; Mahu, Ioan T; Mukhida, Karim                                                                                                                     | The Effect of Preoperative Cannabis Use on Postoperative Pain Following Gynaecologic Oncology Surgery.                                                                                                                                                          | Journal of obstetrics and gynaecology Canada : JOGC = Journal d'obstetrique et gynecologie du Canada : JOGC                         | 2022           |        | 44    | 7 750-756    | <a href="https://dx.doi.org/10.1016/j.jogc.2022.01.018">https://dx.doi.org/10.1016/j.jogc.2022.01.018</a> | Wrong concept (study reporting/evaluating the risk of developing cancer associated with CBP use in other populations). |
| Tumati, Shankar; Lancot, Krista L; Wang, RuoDing; Li, Abby; Davis, Andrew; Herrmann, Nathan                                                                       | Medical Cannabis Use Among Older Adults in Canada: Self-Reported Data on Types and Amount Used, and Perceived Effects.                                                                                                                                          | Drugs & aging                                                                                                                       | 2022           |        | 39    | 2 153-163    | <a href="https://dx.doi.org/10.1007/s40266-021-00913-y">https://dx.doi.org/10.1007/s40266-021-00913-y</a> | No information about AEs for cancer population.                                                                        |
| Divisic, Antuan; Avagnina, Irene; De Tommasi, Valentina; Santini, Anna; Brogelli, Laura; Giacomelli, Luca; Benini, Franca                                         | The use of medical cannabis in pediatric palliative care: a case series.                                                                                                                                                                                        | Italian journal of pediatrics                                                                                                       | 2021           |        | 47    | 1 229        | <a href="https://dx.doi.org/10.1186/s13052-021-01179-1">https://dx.doi.org/10.1186/s13052-021-01179-1</a> | No information about AEs for cancer population.                                                                        |
| McTaggart-Cowan, Helen; Bentley, Colene; Raymakers, Adam; Metcalfe, Rebecca; Hawley, Philippa; Peacock, Stuart                                                    | Understanding cancer survivors' reasons to medicate with cannabis: A qualitative study based on the theory of planned behavior.                                                                                                                                 | Cancer medicine                                                                                                                     | 2021           |        | 10    | 1 396-404    | <a href="https://dx.doi.org/10.1002/cam4.3536">https://dx.doi.org/10.1002/cam4.3536</a>                   | No information about AEs for cancer population.                                                                        |
| Hawley, Philippa; Gobbo, Monica; Afghari, Narsis                                                                                                                  | The impact of legalization of access to recreational Cannabis on Canadian medical users with Cancer.                                                                                                                                                            | BMC health services research                                                                                                        | 2020           |        | 20    | 1 977        | <a href="https://dx.doi.org/10.1186/s12913-020-05756-8">https://dx.doi.org/10.1186/s12913-020-05756-8</a> | No information about AEs for cancer population.                                                                        |
| Hardy, Janet; Haywood, Alison; Gogna, Gauri; Martin, Jennifer; Yates, Patsy; Greer, Ristan; Good, Phillip                                                         | Oral medicinal cannabinoids to relieve symptom burden in the palliative care of patients with advanced cancer: a double-blind, placebo-controlled, randomised clinical trial of efficacy and safety of 1:1 delta-9-tetrahydrocannabinol (THC) and cannabidiol ( | Trials                                                                                                                              | 2020           |        | 21    | 1 611        | <a href="https://dx.doi.org/10.1186/s13063-020-04541-6">https://dx.doi.org/10.1186/s13063-020-04541-6</a> | Wrong study design (not primary data).                                                                                 |
| Anamnat, Chumpol; Jitrapakulsan, Jiraporn                                                                                                                         | Anti-LGI1 encephalitis in a middle-aged woman who consumes cannabis oil.                                                                                                                                                                                        | Neurological sciences : official journal of the Italian Neurological Society and of the Italian Society of Clinical Neurophysiology | 2020           |        | 41    | 12 3755-3757 | <a href="https://dx.doi.org/10.1007/s10072-020-04497-0">https://dx.doi.org/10.1007/s10072-020-04497-0</a> | No information about AEs for cancer population.                                                                        |
| Lintzeris, Nicholas; Mills, Llewellyn; Suravee, Anastasia; Bravo, Maria; Arkeil, Thomas; Arnold, Jonathon C; Benson, Melissa J; McGregor, Iain S                  | Medical cannabis use in the Australian community following introduction of legal access: the 2018-2019 Online Cross-Sectional Cannabis as Medicine Survey (CAMS-18).                                                                                            | Harm reduction journal                                                                                                              | 2020           |        | 17    | 1 37         | <a href="https://dx.doi.org/10.1186/s12954-020-00377-0">https://dx.doi.org/10.1186/s12954-020-00377-0</a> | No information about AEs for cancer population.                                                                        |
| Podda, Marta; Pagani Bagliacca, Elena; Sironi, Giovanna; Veneroni, Laura; Silva, Matteo; Angi, Martina; Massimino, Maura; Ferrari, Andrea; Clerici, Carlo Alfredo | Cannabinoids use in adolescents and young adults with cancer: a single-center survey.                                                                                                                                                                           | Tumori                                                                                                                              | 2020           |        | 106   | 4 281-285    | <a href="https://dx.doi.org/10.1177/0300891620912022">https://dx.doi.org/10.1177/0300891620912022</a>     | No information about AEs for cancer population.                                                                        |
| Hight, Bridget H; Lesser, Elizabeth R; Johnson, Patrick W; Kaur, Judith S                                                                                         | Tetrahydrocannabinol and Cannabidiol Use in an Outpatient Palliative Medicine Population.                                                                                                                                                                       | The American journal of hospice & palliative care                                                                                   | 2020           |        | 37    | 8 589-593    | <a href="https://dx.doi.org/10.1177/1049909119900378">https://dx.doi.org/10.1177/1049909119900378</a>     | No information about AEs for cancer population.                                                                        |
| Zarrabi, Ali John; Welsh, Justine W; Sniecinski, Roman; Curseen, Kimberly; Gillespie, Theresa; Baer, Wendy; McKenzie-Brown, Anne Marie; Singh, Vinita             | Perception of Benefits and Harms of Medical Cannabis among Seriously Ill Patients in an Outpatient Palliative Care Practice.                                                                                                                                    | Journal of palliative medicine                                                                                                      | 2020           |        | 23    | 4 558-562    | <a href="https://dx.doi.org/10.1089/jpm.2019.0211">https://dx.doi.org/10.1089/jpm.2019.0211</a>           | No information about AEs for cancer population.                                                                        |
| Donovan, Kristine A; Oberoi-Jassal, Ritika; Chang, Young D; Rajasekhara, Sahana; Haas, Meghan F; Randich, Anthony L; Portman, Diane G                             | Cannabis Use in Young Adult Cancer Patients.                                                                                                                                                                                                                    | Journal of adolescent and young adult oncology                                                                                      | 2020           |        | 9     | 1 30-35      | <a href="https://dx.doi.org/10.1089/jayao.2019.0039">https://dx.doi.org/10.1089/jayao.2019.0039</a>       | No information about AEs for cancer population.                                                                        |
| Boland, Diane M; Reidy, Lisa J; Seither, Joshua M; Radtke, Jay M; Lew, Emma O                                                                                     | Forty-Three Fatalities Involving the Synthetic Cannabinoid, 5-Fluoro-ADB: Forensic Pathology and Toxicology Implications.                                                                                                                                       | Journal of forensic sciences                                                                                                        | 2020           |        | 65    | 1 170-182    | <a href="https://dx.doi.org/10.1111/1556-4029.14098">https://dx.doi.org/10.1111/1556-4029.14098</a>       | No information about AEs for cancer population.                                                                        |
| Vulfsons, Simon; Ognitz, Miriam; Bar-Sela, Git; Raz-Pasteur, Ayelet; Eisenberg, Eton                                                                              | Cannabis treatment in hospitalized patients using the SYQE inhaler: Results of a pilot open-label study.                                                                                                                                                        | Palliative & supportive care                                                                                                        | 2020           |        | 18    | 1 Dec-17     | <a href="https://dx.doi.org/10.1017/S147895151900021X">https://dx.doi.org/10.1017/S147895151900021X</a>   | No information about AEs for cancer population.                                                                        |
| Lamba, Nayan; Mahal, Brandon A; Martinez, Ruben; Leland, Peggy; Shih, Helen A                                                                                     | Radiation Therapy Pain Management: Prevalence of Symptoms and Effectiveness of Treatment Options.                                                                                                                                                               | Clinical journal of oncology nursing                                                                                                | 2019           |        | 23    | 5 514-521    | <a href="https://dx.doi.org/10.1188/8/19.CJON.514-521">https://dx.doi.org/10.1188/8/19.CJON.514-521</a>   | No information about AEs for cancer population.                                                                        |

55. Excluded Articles

| Authors                                                                                                                                                                                                                                                   | Title                                                                                                                                                | Journal                                                                                      | Published Year | Volume | Issue     | Pages     | DOI                                                                                                       | Exclusion Reason                                                                                                       |
|-----------------------------------------------------------------------------------------------------------------------------------------------------------------------------------------------------------------------------------------------------------|------------------------------------------------------------------------------------------------------------------------------------------------------|----------------------------------------------------------------------------------------------|----------------|--------|-----------|-----------|-----------------------------------------------------------------------------------------------------------|------------------------------------------------------------------------------------------------------------------------|
| Bialas, Patric; Drescher, Beate; Gottschling, Sven; Juckenhofel, Stephanie; Konietzke, Dieter; Kuntz, Wolfgang; Kuhne-Adler, Isabell; Mert-Rippinger, Heidi; Preisegger, Diether; Schneider, Kathrein; Straus, Manfred; Welsch, Patrick; Hauser, Winfried | [Cannabis-based medicines for chronic pain: indications, selection of drugs, effectiveness and safety : Experiences of pain physicians in Saarland]. | Schmerz (Berlin, Germany)                                                                    | 2019           | 33     | 5         | 399-406   | <a href="https://dx.doi.org/10.1007/s00482-019-0383-1">https://dx.doi.org/10.1007/s00482-019-0383-1</a>   | Non-English language article.                                                                                          |
| Wilson, Matthew McEwen; Masterson, Emily; Broglio, Kathleen                                                                                                                                                                                               | Cannabis Use among Patients in a Rural Academic Palliative Care Clinic.                                                                              | Journal of palliative medicine                                                               | 2019           | 22     | 10        | 1224-1226 | <a href="https://dx.doi.org/10.1089/jpm.2018.0534">https://dx.doi.org/10.1089/jpm.2018.0534</a>           | No information about AEs for cancer population.                                                                        |
| Steele, Grant; Ameson, Tom; Zylla, Dylan                                                                                                                                                                                                                  | A Comprehensive Review of Cannabis in Patients with Cancer: Availability in the USA, General Efficacy, and Safety.                                   | Current oncology reports                                                                     | 2019           | 21     | 1         | 10        | <a href="https://dx.doi.org/10.1007/s11912-019-0752-7">https://dx.doi.org/10.1007/s11912-019-0752-7</a>   | Wrong study design (not primary data).                                                                                 |
| Martell, K; Fairchild, A; LeGerrier, B; Sinha, R; Baker, S; Liu, H; Ghose, A; Olivetto, J A; Kerba, M                                                                                                                                                     | Rates of cannabis use in patients with cancer.                                                                                                       | Current oncology (Toronto, Ont.)                                                             | 2018           | 25     | 3         | 219-225   | <a href="https://dx.doi.org/10.3747/co.25.3983">https://dx.doi.org/10.3747/co.25.3983</a>                 | No information about AEs for cancer population.                                                                        |
| Abuhasira, Ran; Schleider, Lih Bar-Lev; Mechoulam, Raphael; Novack, Victor                                                                                                                                                                                | Epidemiological characteristics, safety and efficacy of medical cannabis in the elderly.                                                             | European journal of internal medicine                                                        | 2018           | 49     | 9003220   | 44-50     | <a href="https://dx.doi.org/10.1016/j.ejim.2018.01.019">https://dx.doi.org/10.1016/j.ejim.2018.01.019</a> | No information about AEs for cancer population.                                                                        |
| Ozturk, Hayriye M; Erdogan, Mehmet; Alsancaak, Yakup; Yarlioglu, Mikail; Duran, Mustafa; Boztas, M Hamid; Murat, Sani N; Ozturk, Selcuk                                                                                                                   | Electrocardiographic alterations in patients consuming synthetic cannabinoids.                                                                       | Journal of psychopharmacology (Oxford, England)                                              | 2018           | 32     | 3         | 296-301   | <a href="https://dx.doi.org/10.1177/0269881117736918">https://dx.doi.org/10.1177/0269881117736918</a>     | No information about AEs for cancer population.                                                                        |
| Vin-Raviv, Neomi; Akinyemiju, Tomi; Meng, Qingrui; Sakhuja, Swati; Hayward, Reid                                                                                                                                                                          | Marijuana use and inpatient outcomes among hospitalized patients: analysis of the nationwide inpatient sample database.                              | Cancer medicine                                                                              | 2017           | 6      | 1         | 320-329   | <a href="https://dx.doi.org/10.1002/cam4.968">https://dx.doi.org/10.1002/cam4.968</a>                     | Wrong concept (study reporting/evaluating the risk of developing cancer associated with CBP use in other populations). |
| Fanelli, Guido; De Carolis, Giuliano; Leonardi, Claudio; Longobardi, Adele; Sarti, Ennio; Allegrì, Massimo; Schatman, Michael E                                                                                                                           | Cannabis and intractable chronic pain: an explorative retrospective analysis of Italian cohort of 614 patients.                                      | Journal of pain research                                                                     | 2017           | 10     | 101540514 | 1217-1224 | <a href="https://dx.doi.org/10.2147/JPR.S132814">https://dx.doi.org/10.2147/JPR.S132814</a>               | No information about AEs for cancer population.                                                                        |
| Zolotov, Yuval; Baruch, Yehuda; Reuveni, Haim; Magnezi, Rachel                                                                                                                                                                                            | Adherence to Medical Cannabis Among Licensed Patients in Israel.                                                                                     | Cannabis and cannabinoid research                                                            | 2016           | 1      | 1         | 16-21     | <a href="https://dx.doi.org/10.1089/can.2015.0003">https://dx.doi.org/10.1089/can.2015.0003</a>           | No information about AEs for cancer population.                                                                        |
| Elder, Joshua J; Knoderer, Holly M                                                                                                                                                                                                                        | Characterization of Dronabinol Usage in a Pediatric Oncology Population.                                                                             | The journal of pediatric pharmacology and therapeutics : JPPT : the official journal of PPAG | 2015           | 20     | 6         | 462-7     | <a href="https://dx.doi.org/10.5863/1551-6776-20.6.462">https://dx.doi.org/10.5863/1551-6776-20.6.462</a> | No information about AEs for cancer population.                                                                        |
| Aldington, S; Harwood, M; Cox, B; Weatherall, M; Beckert, L; Hansell, A; Pritchard, A; Robinson, G; Beasley, R                                                                                                                                            | Cannabis use and risk of lung cancer: a case-control study.                                                                                          | The European respiratory journal                                                             | 2008           | 31     | 2         | 280-6     | <a href="https://dx.doi.org/10.1183/09031936.00065707">https://dx.doi.org/10.1183/09031936.00065707</a>   | Wrong concept (study reporting/evaluating the risk of developing cancer associated with CBP use in other populations). |
| Gorter, Robert W; Butorac, Mario; Cobian, Eloy Pulido; van der Sluis, Willem                                                                                                                                                                              | Medical use of cannabis in the Netherlands.                                                                                                          | Neurology                                                                                    | 2005           | 64     | 5         | 917-9     |                                                                                                           | No information about AEs for cancer population.                                                                        |
| Schwartz, R H; Beveridge, R A                                                                                                                                                                                                                             | Marijuana as an antiemetic drug: how useful is it today? Opinions from clinical oncologists.                                                         | Journal of addictive diseases                                                                | 1994           | 13     | 1         | 53-65     |                                                                                                           | Hearsay/opinion on AEs.                                                                                                |
| Sacks, N; Hutcheson, J R Jr; Watts, J M; Webb, R E                                                                                                                                                                                                        | Case report: the effect of tetrahydrocannabinol on food intake during chemotherapy.                                                                  | Journal of the American College of Nutrition                                                 | 1990           | 9      | 6         | 630-2     |                                                                                                           | No information about AEs for cancer population.                                                                        |
| Few, B J                                                                                                                                                                                                                                                  | Nabilone as an antiemetic for children undergoing chemotherapy.                                                                                      | MCN. The American journal of maternal child nursing                                          | 1988           | 13     | 3         | 209       |                                                                                                           | Wrong study design (not primary data).                                                                                 |
| Ward, A; Holmes, B                                                                                                                                                                                                                                        | Nabilone. A preliminary review of its pharmacological properties and therapeutic use.                                                                | Drugs                                                                                        | 1985           | 30     | 2         | 127-44    |                                                                                                           | Wrong study design (not primary data).                                                                                 |
| George, M; Pejovic, M H; Thuair, M; Kramar, A; Wolff, J P                                                                                                                                                                                                 | [Randomized comparative trial of a new anti-emetic: nabilone, in cancer patients treated with cisplatin].                                            | Biomedicine & pharmacotherapy = Biomedecine & pharmacotherapie                               | 1983           | 37     | 1         | 24-Jul    |                                                                                                           | Non-English language article.                                                                                          |
| Heim, M E; Queisser, W                                                                                                                                                                                                                                    | [Treatment of refractory cytostatic agent-induced vomiting with the synthetic cannabinoid levonantradol].                                            | Onkologie                                                                                    | 1982           | 5      | 2         | 94-6      |                                                                                                           | Non-English language article.                                                                                          |
| Cocchetto, D M; Cook, L F; Cato, A E                                                                                                                                                                                                                      | A critical review of the safety and antiemetic efficacy of delta-9-tetrahydrocannabinol.                                                             | Drug intelligence & clinical pharmacy                                                        | 1981           | 15     | 11        | 867-75    |                                                                                                           | Unable to obtain full text.                                                                                            |
| Williams, C J; Bolton, A; de Pemberton, R; Whitehouse, J M                                                                                                                                                                                                | Antiemetics for patients treated with antitumor chemotherapy.                                                                                        | Cancer clinical trials                                                                       | 1980           | 3      | 4         | 363-7     |                                                                                                           | No information about AEs for cancer population.                                                                        |

55. Excluded Articles

| Authors                                                                                                                     | Title                                                                                                                                                                                                                               | Journal                                       | Published Year | Volume | Issue | Pages        | DOI                                                                                                                       | Exclusion Reason                                                                                                        |
|-----------------------------------------------------------------------------------------------------------------------------|-------------------------------------------------------------------------------------------------------------------------------------------------------------------------------------------------------------------------------------|-----------------------------------------------|----------------|--------|-------|--------------|---------------------------------------------------------------------------------------------------------------------------|-------------------------------------------------------------------------------------------------------------------------|
| Kawka M.; Erridge S.; Holvey C.; Coomber R.; Usmani A.; Sajad M.; Platt M.W.; Rucker J.J.; Sodergren M.H.                   | Clinical outcome data of first cohort of chronic pain patients treated with cannabis-based sublingual oils in the United Kingdom - Analysis from the UK Medical Cannabis Registry                                                   | European Journal of General Practice          | 2023           |        | 29    | 1            | <a href="https://dx.doi.org/10.1080/13814788.2023.217139">https://dx.doi.org/10.1080/13814788.2023.217139</a>             | Meeting abstracts on RCTs/non-RCTs/surveys/case series or case studies with very low quality non-specific AE reporting. |
| Segar J.; Farr K.; Junak M.; Roe D.; Ehsani S.; Jiralepong S.; Mohab I.; Vanderah T.; Chalasani P.                          | Evaluation of Dronabinol to Decrease Opioid Use for Cancer- Induced Bone Pain                                                                                                                                                       | Cancer Research                               | 2023           |        | 83    | 5 Supplement | <a href="https://dx.doi.org/10.1158/1538-7445.SABCS22-P4-04-02">https://dx.doi.org/10.1158/1538-7445.SABCS22-P4-04-02</a> | Meeting abstracts on RCTs/non-RCTs/surveys/case series or case studies with very low quality non-specific AE reporting. |
| Horsted T.; Hesthaven K.L.; Leutscher P.D.C.                                                                                | Safety and effectiveness of cannabinoids to Danish patients with treatment refractory chronic pain-A retrospective observational real-world study                                                                                   | European Journal of Pain (United Kingdom)     | 2023           |        | 27    | 2            | <a href="https://dx.doi.org/10.1002/ejp.2054">https://dx.doi.org/10.1002/ejp.2054</a>                                     | No information about AEs for cancer population.                                                                         |
| Keyhani S.; Leonard S.; Byers A.L.; Zaman T.; Krebs E.; Austin P.C.; Moss-Vazquez T.; Austin C.; Sandbrink F.; Bravata D.M. | Association of a Positive Drug Screening for Cannabis with Mortality and Hospital Visits among Veterans Affairs Enrollees Prescribed Opioids                                                                                        | JAMA Network Open                             | 2022           |        | 5     | 12           | <a href="https://dx.doi.org/10.1001/jamanetworkopen.2022.47201">https://dx.doi.org/10.1001/jamanetworkopen.2022.47201</a> | No information about AEs for cancer population.                                                                         |
| Rombouts M.; Karg R.; Crut M.                                                                                               | A DESCRIPTIVE, OBSERVATIONAL AND CROSSSECTIONAL STUDY TO DETERMINE THE PREVALENCE AND RISKS OF COMPLEMENTARY AND ALTERNATIVE MEDICINE USE IN AN ADULT DUTCH (HEMATO)-ONCOLOGY POPULATION RECEIVING CONCURRENT ANTI-CANCER TREATMENT | European Journal of Oncology Pharmacy         | 2023           |        | 6     | 1 Supplement | <a href="https://dx.doi.org/10.1097/OP9.000000000000004">https://dx.doi.org/10.1097/OP9.000000000000004</a>               | Meeting abstracts on RCTs/non-RCTs/surveys/case series or case studies with very low quality non-specific AE reporting. |
| Ueberall M.A.; Horlemann J.; Schuermann N.; Kalaba M.; Ware M.A.                                                            | Effectiveness and Tolerability of Dronabinol Use in Patients with Chronic Pain: A Retrospective Analysis of 12-Week Open-Label Real-World Data Provided by the German Pain e-Registry                                               | Pain Medicine (United States)                 | 2022           |        | 23    | 8            | <a href="https://dx.doi.org/10.1093/pm/pnac010">https://dx.doi.org/10.1093/pm/pnac010</a>                                 | No information about AEs for cancer population.                                                                         |
| Massalha H.; Tocut M.; Stein M.; Zandman-Goddard G.                                                                         | Hypereosinophilia and Paraneoplastic Syndrome: An Unusual Presentation with an Unexpected Diagnosis                                                                                                                                 | Israel Medical Association Journal            | 2022           |        | 24    | 11           | 779-780                                                                                                                   | Wrong concept (study reporting/evaluating the risk of developing cancer associated with CBP use in other populations).  |
| Wanishpongpan S.; Oranratanaphan S.                                                                                         | A RANDOMIZED CONTROLLED STUDY BETWEEN THC CANNABIS OIL AND PLACEBO ADDED ON STANDARD PROPHYLAXIS FOR REDUCING CHEMOTHERAPY-INDUCED NAUSEA VOMITING (CINV) FOLLOWING CARBOPLATIN AND PACLITAXEL REGIMEN                              | International Journal of Gynecological Cancer | 2022           |        | 32    | Supplement 3 | <a href="https://dx.doi.org/10.1136/ijgc-2022-igcs.490">https://dx.doi.org/10.1136/ijgc-2022-igcs.490</a>                 | Meeting abstracts on RCTs/non-RCTs/surveys/case series or case studies with very low quality non-specific AE reporting. |
| Zarrabi A.J.; Welsh J.W.; Sniecinski R.; Curseen K.; Gillespie T.; Baer W.; McKenzie-Brown A.M.; Singh V.                   | Perception of Benefits and Harms of Medical Cannabis among Seriously Ill Patients in an Outpatient Palliative Care Practice                                                                                                         | Journal of palliative medicine                | 2019           |        |       |              | <a href="https://dx.doi.org/10.1089/jpm.2019.0211">https://dx.doi.org/10.1089/jpm.2019.0211</a>                           | No information about AEs for cancer population.                                                                         |

55. Excluded Articles

| Authors                                                                                                                    | Title                                                                                                                                                         | Journal                                        | Published Year | Volume | Issue                                                                                                                                                           | Pages        | DOI                                                                                                                   | Exclusion Reason                                                                                                        |
|----------------------------------------------------------------------------------------------------------------------------|---------------------------------------------------------------------------------------------------------------------------------------------------------------|------------------------------------------------|----------------|--------|-----------------------------------------------------------------------------------------------------------------------------------------------------------------|--------------|-----------------------------------------------------------------------------------------------------------------------|-------------------------------------------------------------------------------------------------------------------------|
| Donovan K.A.; Oberoi-Jassal R.; Chang Y.D.; Rajasekhara S.; Haas M.F.; Randich A.L.; Portman D.G.                          | Cannabis Use in Young Adult Cancer Patients                                                                                                                   | Journal of adolescent and young adult oncology | 2019           |        | (Donovan, Oberoi-Jassal, Chang, Rajasekhara, Haas, Randich, Portman)<br>Department of Supportive Care Medicine, Moffitt Cancer Center, Tampa, FL, United States |              | <a href="https://dx.doi.org/10.1089/jayao.2019.0039">https://dx.doi.org/10.1089/jayao.2019.0039</a>                   | No information about AEs for cancer population.                                                                         |
| Ashare R.; Turay E.; Worster B.; Meghani S.                                                                                | Social Determinants of Health Associated With How Cannabis is Obtained and Used in Patients With Cancer                                                       | Neuropsychopharmacology                        | 2022           | 47     | Supplement 1                                                                                                                                                    | 462          | <a href="https://dx.doi.org/10.1038/s41386-022-01486-z">https://dx.doi.org/10.1038/s41386-022-01486-z</a>             | No information about AEs for cancer population.                                                                         |
| Trojan A.; Bretkopf S.; Pittl S.; Heeren M.                                                                                | SwissCanOn - scientific patient registry for medicinal cannabis in oncology including ePROs - Trial in Progress                                               | Swiss Medical Weekly                           | 2022           | 152    |                                                                                                                                                                 | 265 50S      |                                                                                                                       | Meeting abstracts on RCTs/non-RCTs/surveys/case series or case studies with very low quality non-specific AE reporting. |
| Lakhani S.; Scalzitti D.A.; Padrone L.; Martins-Welch D.                                                                   | From evidence to practice: early integration of palliative care in a comprehensive cancer center                                                              | Supportive Care in Cancer                      | 2023           | 31     |                                                                                                                                                                 | 1            | <a href="https://dx.doi.org/10.1007/s00520-022-07510-8">https://dx.doi.org/10.1007/s00520-022-07510-8</a>             | No information about AEs for cancer population.                                                                         |
| Nathan R.A.; Tonderai C.; Mupamombe; Walter M.; Case A.A.; Hansen E.                                                       | Use of medical cannabis in treating anorexia and nausea in elderly cancer patients                                                                            | Journal of Clinical Oncology                   | 2019           | 37     | 31 Supplement 1                                                                                                                                                 |              | <a href="https://dx.doi.org/10.1200/JCO.2019.37.31_suppl.124">https://dx.doi.org/10.1200/JCO.2019.37.31_suppl.124</a> | Meeting abstracts on RCTs/non-RCTs/surveys/case series or case studies with very low quality non-specific AE reporting. |
| Donovan K.A.                                                                                                               | Age-related differences in cannabis use by cancer patients referred for supportive care. Diane Portman                                                        | Journal of Clinical Oncology                   | 2019           | 37     | 31 Supplement 1                                                                                                                                                 |              | <a href="https://dx.doi.org/10.1200/JCO.2019.37.31_suppl.104">https://dx.doi.org/10.1200/JCO.2019.37.31_suppl.104</a> | Meeting abstracts on RCTs/non-RCTs/surveys/case series or case studies with very low quality non-specific AE reporting. |
| Cantor E.; Meyer A.; Morris S.M.; Weisenberg J.L.Z.; Brossier N.M.                                                         | Dose-dependent seizure control with MEK inhibitor therapy for progressive glioma in a child with neurofibromatosis type 1                                     | Child's Nervous System                         | 2022           | 38     |                                                                                                                                                                 | 11 2245-2249 | <a href="https://dx.doi.org/10.1007/s00381-022-05571-y">https://dx.doi.org/10.1007/s00381-022-05571-y</a>             | No information about AEs for cancer population.                                                                         |
| Zurcher K.; Dupont C.; Weber P.; Grunt S.; Wilhelm I.; Eigenmann D.E.; Reichmuth M.L.; Fankhauser M.; Egger M.; Fenner L.  | Use and caregiver-reported efficacy of medical cannabis in children and adolescents in Switzerland                                                            | European Journal of Pediatrics                 | 2022           | 181    |                                                                                                                                                                 | 1 335-347    | <a href="https://dx.doi.org/10.1007/s00431-021-04202-z">https://dx.doi.org/10.1007/s00431-021-04202-z</a>             | Meeting abstracts on RCTs/non-RCTs/surveys/case series or case studies with very low quality non-specific AE reporting. |
| Salz T.; Meza A.M.; Chino F.; Mao J.J.J.; Raghunathan N.J.; Jinna S.; Brens J.; Hernandez M.; Korenstein D.                | Sociodemographic predictors of cannabis use among patients with cancer residing in states with legalized cannabis                                             | Journal of Clinical Oncology                   | 2022           | 40     | 28 Supplement                                                                                                                                                   | 299          | <a href="https://dx.doi.org/10.1200/JCO.2022.40.28_suppl.299">https://dx.doi.org/10.1200/JCO.2022.40.28_suppl.299</a> | Meeting abstracts on RCTs/non-RCTs/surveys/case series or case studies with very low quality non-specific AE reporting. |
| Zer A.; Goshen-Lago T.G.; Ben-Aharon I.; Passhak M.                                                                        | 1609P Cannabis impacts on serologic status and toxic effects of the SARS-CoV-2 BNT162b2 vaccine in patients undergoing treatment for cancer                   | Annals of Oncology                             | 2022           | 33     | Supplement 7                                                                                                                                                    | S1278        | <a href="https://dx.doi.org/10.1016/j.annonc.2022.07.1702">https://dx.doi.org/10.1016/j.annonc.2022.07.1702</a>       | Meeting abstracts on RCTs/non-RCTs/surveys/case series or case studies with very low quality non-specific AE reporting. |
| Raghunathan N.J.; Brens J.; Vemuri S.; Mao J.J.; Korenstein D.R.                                                           | IN THE WEEDS: PATIENT INTEREST IN AND EXPERIENCE WITH CANNABIS AT A CANCER CENTER                                                                             | Journal of General Internal Medicine           | 2022           | 37     | Supplement 2                                                                                                                                                    | S152-S153    | <a href="https://dx.doi.org/10.1007/s11606-022-07653-8">https://dx.doi.org/10.1007/s11606-022-07653-8</a>             | Meeting abstracts on RCTs/non-RCTs/surveys/case series or case studies with very low quality non-specific AE reporting. |
| Toftthagen C.; Starr J.; Perlman A.; Advani P.; Tan W.; Ernst B.                                                           | MEDICAL CANNABIS USE FOR CANCER RELATED SYMPTOMS AMONG FLORIDIANS: A DESCRIPTIVE STUDY                                                                        | Supportive Care in Cancer                      | 2022           | 30     | Supplement 1                                                                                                                                                    | S155         | <a href="https://dx.doi.org/10.1007/s00520-022-07099-y">https://dx.doi.org/10.1007/s00520-022-07099-y</a>             | Meeting abstracts on RCTs/non-RCTs/surveys/case series or case studies with very low quality non-specific AE reporting. |
| Agar M.; Naumovski V.; Chye R.; Solowij N.; Galletis P.; Liu Z.; Lintzeris N.; Currow D.; Phillips J.; Noble B.; Martin J. | Phase I/II Dose Ranging Study of the Pharmacokinetics, Dose-Response Parameters and Feasibility of Vaporised Botanical Cannabis Flower Bud in Advanced Cancer | Palliative Medicine                            | 2022           | 36     | 1 SUPPL                                                                                                                                                         | 71-72        | <a href="https://dx.doi.org/10.1177/02692163221093145">https://dx.doi.org/10.1177/02692163221093145</a>               | Meeting abstracts on RCTs/non-RCTs/surveys/case series or case studies with very low quality non-specific AE reporting. |
| Son Y.; Fink B.; Klimowich K.; Madison I.; Scati J.; DeVincentz D.; Chialastri P.; Mueller T.; Brown G.                    | ANALYZING MEDICAL MARIJUANA'S EFFECT ON NARCOTIC PAIN MEDICATION CONSUMPTION IN PATIENTS WITH PROSTATE CANCER                                                 | Journal of Urology                             | 2022           | 207    | SUPPL 5                                                                                                                                                         | e458-e459    | <a href="https://dx.doi.org/10.1097/JUJ.0000000000002570.20">https://dx.doi.org/10.1097/JUJ.0000000000002570.20</a>   | Meeting abstracts on RCTs/non-RCTs/surveys/case series or case studies with very low quality non-specific AE reporting. |

55. Excluded Articles

| Authors                                                                                                                                                                                                                                                                    | Title                                                                                                                                                                                                                                                            | Journal                                                                   | Published Year | Volume | Issue                                                                                         | Pages     | DOI                                                                                                                             | Exclusion Reason                                                                                                        |
|----------------------------------------------------------------------------------------------------------------------------------------------------------------------------------------------------------------------------------------------------------------------------|------------------------------------------------------------------------------------------------------------------------------------------------------------------------------------------------------------------------------------------------------------------|---------------------------------------------------------------------------|----------------|--------|-----------------------------------------------------------------------------------------------|-----------|---------------------------------------------------------------------------------------------------------------------------------|-------------------------------------------------------------------------------------------------------------------------|
| Keil F.                                                                                                                                                                                                                                                                    | AGMT-DISCOVER: Multicenter-randomized, double-blind-placebo-controlled, phase-III-clinical-trial to investigate efficacy + safety of Dronabinol in the Improvement of ChemOTherapy-induced and tumor-Related-symptoms in patients with locally-advanced or metas | Memo - Magazine of European Medical Oncology                              | 2022           |        | (Keil) 3rd Department of Medicine, Hematology and Oncology, Hanusch Hospital, Vienna, Austria | S59       | <a href="https://dx.doi.org/10.1007/s12254-021-00793-3">https://dx.doi.org/10.1007/s12254-021-00793-3</a>                       | Meeting abstracts on RCTs/non-RCTs/surveys/case series or case studies with very low quality non-specific AE reporting. |
| Grogan N.; Henry N.L.                                                                                                                                                                                                                                                      | Characterizing cannabidiol use in a breast cancer population                                                                                                                                                                                                     | Cancer Research                                                           | 2022           | 82     | 4 SUPPL                                                                                       |           | <a href="https://dx.doi.org/10.1158/1538-7445.SABCS21-P4-10-08">https://dx.doi.org/10.1158/1538-7445.SABCS21-P4-10-08</a>       | Meeting abstracts on RCTs/non-RCTs/surveys/case series or case studies with very low quality non-specific AE reporting. |
| Awofisayo S.O.; Eyen N.; Awofisayo J.; Arhewoh M.I.                                                                                                                                                                                                                        | Clinical impact: Safety and efficacy of cannabidiol "CBD" predicated on users' quality-of-life assessments in southern nigeria                                                                                                                                   | International Journal of Pharmaceutical and Phytopharmacological Research | 2021           | 11     |                                                                                               | 3 21-28   | <a href="https://dx.doi.org/10.51847/OTYDE20tm">https://dx.doi.org/10.51847/OTYDE20tm</a>                                       | No information about AEs for cancer population.                                                                         |
| Blondin N.                                                                                                                                                                                                                                                                 | Observations of complementary cannabis therapy in malignant glioma patients                                                                                                                                                                                      | Neuro-Oncology                                                            | 2021           | 23     | SUPPL 6                                                                                       | vi183     | <a href="https://dx.doi.org/10.1093/neuonc/noab196.724">https://dx.doi.org/10.1093/neuonc/noab196.724</a>                       | Meeting abstracts on RCTs/non-RCTs/surveys/case series or case studies with very low quality non-specific AE reporting. |
| Sikali J.; Fletcher C.; Gillespie A.; Hall L.; Henson J.; Hall S.; Team M.S.L.; Vitetta L.                                                                                                                                                                                 | An observational study investigating and auditing the safety, tolerability and further efficacy characteristics of a pharmaceutical grade cannabis-based medicine prescribed to eligible patients for the management of cancer related or non-cancer related pa  | Asia-Pacific Journal of Clinical Oncology                                 | 2021           | 17     | SUPPL 9                                                                                       | 134       | <a href="https://dx.doi.org/10.1111/ajco.13716">https://dx.doi.org/10.1111/ajco.13716</a>                                       | Meeting abstracts on RCTs/non-RCTs/surveys/case series or case studies with very low quality non-specific AE reporting. |
| Mersiades A.; Tognela A.; Kirby A.; Stockler M.; Lintzeris N.; Simes J.; Haber P.; Oliver I.; Abdi E.; Delta-Fiorentina S.; Fox P.; Aghmesheh M.; Chan M.; Kichendadasse G.; Briscoe K.; Wheeler H.; Sanmugarajah J.; Morton R.L.; Dieng M.; Walsh A.; Lee Y.; Grimison P. | Definitive randomised double-blind placebo-controlled trial evaluating an oral cannabinoid-rich THC/CBD cannabis extract for chemotherapy-induced nausea and vomiting (CINV): Trial in progress                                                                  | Asia-Pacific Journal of Clinical Oncology                                 | 2021           | 17     | SUPPL 9                                                                                       | 203-204   | <a href="https://dx.doi.org/10.1111/ajco.13716">https://dx.doi.org/10.1111/ajco.13716</a>                                       | Meeting abstracts on RCTs/non-RCTs/surveys/case series or case studies with very low quality non-specific AE reporting. |
| Gandhi A.A.G.; Khan Y.Y.K.; Nguyen B.B.N.                                                                                                                                                                                                                                  | Patterns of use of cannabis in WA cancer patients: A survey                                                                                                                                                                                                      | Asia-Pacific Journal of Clinical Oncology                                 | 2021           | 17     | SUPPL 9                                                                                       | 122       | <a href="https://dx.doi.org/10.1111/ajco.13716">https://dx.doi.org/10.1111/ajco.13716</a>                                       | Meeting abstracts on RCTs/non-RCTs/surveys/case series or case studies with very low quality non-specific AE reporting. |
| Weiss M.; Danese S.; Ruiz K.A.; Kjelstrom S.; Buckley M.; Leitenberger A.; Bollmann-Jenkins M.; Larson S.; DeNittis A.S.; Martinez D.                                                                                                                                      | A Survey of Breast Cancer Patients' Use of Cannabis During Radiation Therapy                                                                                                                                                                                     | International Journal of Radiation Oncology Biology Physics               | 2021           | 111    | 3 Supplement                                                                                  | e165-e166 | <a href="https://dx.doi.org/10.1016/j.ijrobp.2021.07.642">https://dx.doi.org/10.1016/j.ijrobp.2021.07.642</a>                   | Meeting abstracts on RCTs/non-RCTs/surveys/case series or case studies with very low quality non-specific AE reporting. |
| Bargnes V.; Mechtler L.; Ralyea C.; Hart P.; Benyovszky A.                                                                                                                                                                                                                 | A retrospective cohort study of medical cannabis treatment in patients with glioblastoma multiforme                                                                                                                                                              | Neurology                                                                 | 2021           | 96     | 15 SUPPL 1                                                                                    |           |                                                                                                                                 | Meeting abstracts on RCTs/non-RCTs/surveys/case series or case studies with very low quality non-specific AE reporting. |
| Bailey-Dorton C.M.; Gentile D.; Boselli D.; Yaguda S.; Greiner R.                                                                                                                                                                                                          | Cannabidiol (CBD) use among cancer survivors                                                                                                                                                                                                                     | Journal of Clinical Oncology                                              | 2021           | 39     | 15 SUPPL                                                                                      |           | <a href="https://dx.doi.org/10.1200/JCO.2021.39.15_suppl.12096">https://dx.doi.org/10.1200/JCO.2021.39.15_suppl.12096</a>       | Meeting abstracts on RCTs/non-RCTs/surveys/case series or case studies with very low quality non-specific AE reporting. |
| Nielsen S.; Eckhoff L.; Ruhlmann C.; Bronnum D.; Herrstedt J.; Dalton S.                                                                                                                                                                                                   | Chemotherapy-induced peripheral neuropathy and cannabis use among Danish cancer patients: A cross sectional questionnaire and survey study                                                                                                                       | Supportive Care in Cancer                                                 | 2021           | 29     | SUPPL 1                                                                                       | S122      | <a href="https://dx.doi.org/10.1007/s00520-021-06285-8">https://dx.doi.org/10.1007/s00520-021-06285-8</a>                       | No information about AEs for cancer population.                                                                         |
| Clarke S.J.; Vitetta L.; McLachlan A.J.; Henson J.D.; Rutolo D.; Hall S.                                                                                                                                                                                                   | An oro-buccal nanoparticle delivered cannabis medicine for pain management in cancer: A clinical trial in progress                                                                                                                                               | Journal of Clinical Oncology                                              | 2020           | 38     |                                                                                               | 15        | <a href="https://dx.doi.org/10.1200/JCO.2020.38.15-suppl.TPS12127">https://dx.doi.org/10.1200/JCO.2020.38.15-suppl.TPS12127</a> | Meeting abstracts on RCTs/non-RCTs/surveys/case series or case studies with very low quality non-specific AE reporting. |
| Vigano A.; Canac-Marquis M.; Gamaoun R.; Beaulieu P.; Neron A.; Moride Y.; Martell M.O.; Desroches J.; Perez J.                                                                                                                                                            | The Quebec Cannabis Registry: a pharmacovigilance and effectiveness study on the use of medical cannabis in cancer patients                                                                                                                                      | Journal of Clinical Oncology                                              | 2020           | 38     |                                                                                               | 15        | <a href="https://dx.doi.org/10.1200/JCO.2020.38.15-suppl.12109">https://dx.doi.org/10.1200/JCO.2020.38.15-suppl.12109</a>       | Meeting abstracts on RCTs/non-RCTs/surveys/case series or case studies with very low quality non-specific AE reporting. |
| Weiss M.C.; Buckley M.; Hibbs J.; Leitenberger A.; Jenkins M.; McHugh T.W.; Green N.; Larson S.                                                                                                                                                                            | A survey of cannabis use for symptom palliation in breast cancer patients by age and stage                                                                                                                                                                       | Journal of Clinical Oncology                                              | 2020           | 38     |                                                                                               | 15        | <a href="https://dx.doi.org/10.1200/JCO.2020.38.15-suppl.12108">https://dx.doi.org/10.1200/JCO.2020.38.15-suppl.12108</a>       | Meeting abstracts on RCTs/non-RCTs/surveys/case series or case studies with very low quality non-specific AE reporting. |

55. Excluded Articles

| Authors                                                                                                                                                                                                                                      | Title                                                                                                                                                                                 | Journal                                           | Published Year | Volume | Issue | Pages              | DOI                                                                                                                         | Exclusion Reason                                                                                                        |
|----------------------------------------------------------------------------------------------------------------------------------------------------------------------------------------------------------------------------------------------|---------------------------------------------------------------------------------------------------------------------------------------------------------------------------------------|---------------------------------------------------|----------------|--------|-------|--------------------|-----------------------------------------------------------------------------------------------------------------------------|-------------------------------------------------------------------------------------------------------------------------|
| Vigano A.; Aprikian S.; Kasvis P.; Bacis V.; Al Harrasi A.; Aubin N.M.; Vigano M.; Borod M.                                                                                                                                                  | Safety and effectiveness of medical cannabis as a complementary option for supportive cancer care: Results from the Cannabis Pilot Project                                            | Journal of Clinical Oncology                      | 2020           |        | 38    | 15                 | <a href="https://dx.doi.org/10.1200/JCO.2020.38.15-suppl.12106">https://dx.doi.org/10.1200/JCO.2020.38.15-suppl.12106</a>   | Meeting abstracts on RCTs/non-RCTs/surveys/case series or case studies with very low quality non-specific AE reporting. |
| Subbiah S.; Presant C.A.; Upadhyaya G.; Zheng M.                                                                                                                                                                                             | Cannabis use patterns and patient reported outcomes in oncology and hematology patients: An anonymous survey                                                                          | Journal of Clinical Oncology                      | 2020           |        | 38    | 15                 | <a href="https://dx.doi.org/10.1200/JCO.2020.38.15-suppl.e24143">https://dx.doi.org/10.1200/JCO.2020.38.15-suppl.e24143</a> | Meeting abstracts on RCTs/non-RCTs/surveys/case series or case studies with very low quality non-specific AE reporting. |
| Kannappan S.; Ddamba J.; Martell K.; Arora R.; Sinha R.                                                                                                                                                                                      | EXAMINING CANNABIS USAGE AND CANNABIS-RELATED INFORMATION SOURCING FOR DISEASE MANAGEMENT IN CLINICAL ONCOLOGY                                                                        | Radiotherapy and Oncology                         | 2020           |        | 150   | Supplement 1 S23   | <a href="https://dx.doi.org/10.1016/S0167-8140%2820%2930938-5">https://dx.doi.org/10.1016/S0167-8140%2820%2930938-5</a>     | Meeting abstracts on RCTs/non-RCTs/surveys/case series or case studies with very low quality non-specific AE reporting. |
| Shi R.                                                                                                                                                                                                                                       | Topical cannabis-based medicines: A new treatment for integumentary neoplasms                                                                                                         | Journal of Wound Care                             | 2020           |        | 29    | SUPPL 7B 76        |                                                                                                                             | Meeting abstracts on RCTs/non-RCTs/surveys/case series or case studies with very low quality non-specific AE reporting. |
| Chan M.M.; Roberts-Thomson R.                                                                                                                                                                                                                | The current practice and understanding of medical cannabis use in a single institution medical oncology outpatient setting                                                            | Asia-Pacific Journal of Clinical Oncology         | 2020           |        | 16    | SUPPL 2 31         | <a href="https://dx.doi.org/10.1111/ajco.13417">https://dx.doi.org/10.1111/ajco.13417</a>                                   | Meeting abstracts on RCTs/non-RCTs/surveys/case series or case studies with very low quality non-specific AE reporting. |
| Velazquez Ramos P.M.; Galzerano J.                                                                                                                                                                                                           | Medical cannabis as a therapeutic resource: Preliminary study                                                                                                                         | Medical Cannabis and Cannabinoids                 | 2020           |        | 3     | 2 129              | <a href="https://dx.doi.org/10.1159/000505827">https://dx.doi.org/10.1159/000505827</a>                                     | No information about AEs for cancer population.                                                                         |
| Ibrahim M.E.                                                                                                                                                                                                                                 | Cannabis between medical uses and recreational uses                                                                                                                                   | Medical Cannabis and Cannabinoids                 | 2020           |        | 3     | 2 118-119          | <a href="https://dx.doi.org/10.1159/000505827">https://dx.doi.org/10.1159/000505827</a>                                     | No information about AEs for cancer population.                                                                         |
| Clarke S.; Butcher B.; McLachlan A.J.; Henson J.D.; Rutolo D.; Hall S.; Vitetta L.                                                                                                                                                           | Pilot clinical and pharmacokinetic study of a water soluble nanoparticle cannabis-based medicine in advanced cancer with intractable pain                                             | Asia-Pacific Journal of Clinical Oncology         | 2020           |        | 16    | SUPPL 8 117-118    | <a href="https://dx.doi.org/10.1111/ajco.13498">https://dx.doi.org/10.1111/ajco.13498</a>                                   | Meeting abstracts on RCTs/non-RCTs/surveys/case series or case studies with very low quality non-specific AE reporting. |
| Grimison P.S.; Stockler M.R.; Kirby A.; Walsh A.; Lintzeris N.; Cheung Y.; Mersiades A.; Tognela A.; Haber P.; Simes J.; Morton R.L.; Oliver I.N.; McGregor I.; Gedye C.; Fox P.; Briscoe K.P.; Aghmesheh M.; Abdi E.A.; Delta-Florentina S. | Results of crossover phase 2 component of randomised placebo-controlled trial evaluating oral THC/CBD cannabis extract for refractory chemotherapy-induced nausea and vomiting (CINW) | Asia-Pacific Journal of Clinical Oncology         | 2020           |        | 16    | SUPPL 8 206-207    | <a href="https://dx.doi.org/10.1111/ajco.13498">https://dx.doi.org/10.1111/ajco.13498</a>                                   | Meeting abstracts on RCTs/non-RCTs/surveys/case series or case studies with very low quality non-specific AE reporting. |
| Kirkova Y.; Hughes C.                                                                                                                                                                                                                        | Care of the elderly cognitively impaired palliative patient with cancer                                                                                                               | Journal of the American Geriatrics Society        | 2020           |        | 68    | SUPPL 1 S195-S196  | <a href="https://dx.doi.org/10.1111/jgs.16431">https://dx.doi.org/10.1111/jgs.16431</a>                                     | Meeting abstracts on RCTs/non-RCTs/surveys/case series or case studies with very low quality non-specific AE reporting. |
| Webster E.M.; Yadav G.; Gysler S.; McNamara B.; Black J.D.; Tymon-Rosario J.R.; Zeybek B.; Han C.; Menderes G.; Huang G.S.; Silasi D.A.; Azodi M.; Schwartz P.E.; Santin A.D.; Ratner E.S.; Altwerger G.                                     | Patient experience with medical marijuana in women with gynecologic malignancies: A single-institution survey-based study                                                             | Gynecologic Oncology                              | 2020           |        | 159   | Supplement 1 318   | <a href="https://dx.doi.org/10.1016/j.ygyno.2020.05.575">https://dx.doi.org/10.1016/j.ygyno.2020.05.575</a>                 | Meeting abstracts on RCTs/non-RCTs/surveys/case series or case studies with very low quality non-specific AE reporting. |
| Aubrey R.; Chun H.; Feuz C.; Rosewall T.                                                                                                                                                                                                     | Cannabis Use by Cancer Patients: A Thematic Analysis of Patient-Initiated Cancer Blog Posts                                                                                           | Journal of Medical Imaging and Radiation Sciences | 2020           |        | 51    | 3 Supplement S17   | <a href="https://dx.doi.org/10.1016/j.jmir.2020.07.050">https://dx.doi.org/10.1016/j.jmir.2020.07.050</a>                   | Meeting abstracts on RCTs/non-RCTs/surveys/case series or case studies with very low quality non-specific AE reporting. |
| Lacey J.; Schloss J.M.; Sinclair J.; Steel A.; Sughrue M.; Teo C.; Sibbritt D.                                                                                                                                                               | A phase II double-blind, randomized clinical trial assessing the tolerability of two different ratios of cannabis in patients with glioblastoma multiforme (GBM)                      | Journal of Clinical Oncology                      | 2020           |        | 38    | 15                 | <a href="https://dx.doi.org/10.1200/JCO.2020.38.15-suppl.2530">https://dx.doi.org/10.1200/JCO.2020.38.15-suppl.2530</a>     | Meeting abstracts on RCTs/non-RCTs/surveys/case series or case studies with very low quality non-specific AE reporting. |
| Battle D.; Bergerot C.D.; Msaouel P.; Zhang T.; George D.J.; Staehler M.D.                                                                                                                                                                   | Patient-reported use of marijuana and cannabinoid (CBD) oil in patients with renal cell carcinoma undergoing systemic therapy                                                         | Journal of Clinical Oncology                      | 2020           |        | 38    | 15                 | <a href="https://dx.doi.org/10.1200/JCO.2020.38.15-suppl.5084">https://dx.doi.org/10.1200/JCO.2020.38.15-suppl.5084</a>     | Meeting abstracts on RCTs/non-RCTs/surveys/case series or case studies with very low quality non-specific AE reporting. |
| Weiss M.C.; Hibbs J.; McHugh T.W.; Buckley M.; Larson S.; Green N.; Kaklamani V.G.; Chlebowski R.T.; Martinez D.                                                                                                                             | A survey of breast cancer patients' use of cannabis before, during, and after treatment                                                                                               | Journal of Clinical Oncology                      | 2020           |        | 38    | 15                 | <a href="https://dx.doi.org/10.1200/JCO.2020.38.15-suppl.e19210">https://dx.doi.org/10.1200/JCO.2020.38.15-suppl.e19210</a> | Meeting abstracts on RCTs/non-RCTs/surveys/case series or case studies with very low quality non-specific AE reporting. |
| Benkli B.; Ansoanu G.; Bonfante Meija E.; Smart S.                                                                                                                                                                                           | Levetiracetam in management of bilateral trigeminal neuralgia due to large glomus tumor                                                                                               | Headache                                          | 2020           |        | 60    | Supplement 1 42-43 | <a href="https://dx.doi.org/10.1111/head.13854">https://dx.doi.org/10.1111/head.13854</a>                                   | Meeting abstracts on RCTs/non-RCTs/surveys/case series or case studies with very low quality non-specific AE reporting. |

55. Excluded Articles

| Authors                                                                                                                 | Title                                                                                                                                                                                                    | Journal                                                    | Published Year | Volume | Issue           | Pages     | DOI                                                                                                     | Exclusion Reason                                                                                                        |
|-------------------------------------------------------------------------------------------------------------------------|----------------------------------------------------------------------------------------------------------------------------------------------------------------------------------------------------------|------------------------------------------------------------|----------------|--------|-----------------|-----------|---------------------------------------------------------------------------------------------------------|-------------------------------------------------------------------------------------------------------------------------|
| Mechtler L.; Ralyea C.; Hart P.; Bargnes V.                                                                             | The use of Medical Cannabis in the Treatment of Neuropathies: An Ongoing Retrospective Study                                                                                                             | European Journal of Neurology                              | 2020           |        | 27 Supplement 1 | 863       |                                                                                                         | Meeting abstracts on RCTs/non-RCTs/surveys/case series or case studies with very low quality non-specific AE reporting. |
| Battle D.; Rathmell W.K.; Bergerot C.; Msaouel P.; Jonasch E.; George D.; Zhang T.; Staehler M.                         | Underreporting of side effects in systemic therapy for renal cell carcinoma                                                                                                                              | Journal of Urology                                         | 2020           | 203    | Supplement 4    | e202      |                                                                                                         | Meeting abstracts on RCTs/non-RCTs/surveys/case series or case studies with very low quality non-specific AE reporting. |
| Dolan A.; Portman D.; Donovan K.                                                                                        | Reasons for discontinuing marijuana use in young adult (YA) cancer patients                                                                                                                              | Psycho-Oncology                                            | 2020           |        | 29 Supplement 1 | 64-65     | <a href="https://dx.doi.org/10.1002/pon.5327">https://dx.doi.org/10.1002/pon.5327</a>                   | Meeting abstracts on RCTs/non-RCTs/surveys/case series or case studies with very low quality non-specific AE reporting. |
| Dolan A.; Portman D.; Donovan K.                                                                                        | Young adult cancer patients and marijuana: Characteristics and patterns of use                                                                                                                           | Psycho-Oncology                                            | 2020           | 29     | Supplement 1    | 63        | <a href="https://dx.doi.org/10.1002/pon.5327">https://dx.doi.org/10.1002/pon.5327</a>                   | Meeting abstracts on RCTs/non-RCTs/surveys/case series or case studies with very low quality non-specific AE reporting. |
| Mousa A.; Petrovic M.; Flesher N.E.                                                                                     | Prevalence and predictors of cannabis use among men receiving androgen-deprivation therapy for advanced prostate cancer                                                                                  | Canadian Urological Association Journal                    | 2019           | 14     | 1               | E20-E26   | <a href="https://dx.doi.org/10.5489/CUAJ.5911">https://dx.doi.org/10.5489/CUAJ.5911</a>                 | No information about AEs for cancer population.                                                                         |
| do Nascimento R.G.F.O.; de Souza L.G.; Vieira Santos F.R.P.; de Souza Andrade Filho A.                                  | Cannabinoides use in the control of convulsive crisis in astrocytoma after neurosurgery                                                                                                                  | Revista Brasileira de Neurologia e Psiquiatria             | 2019           | 23     | 2               | 177-186   |                                                                                                         | Non-English language article.                                                                                           |
| Likar R.; Koestenberger M.; Stuttschnig M.; Nahler G.                                                                   | Concomitant treatment of malignant brain tumours with CBD - A case series and review of the literature                                                                                                   | Anticancer Research                                        | 2019           | 39     | 10              | 5797-5801 | <a href="https://dx.doi.org/10.21873/anticancer.13783">https://dx.doi.org/10.21873/anticancer.13783</a> | No information about AEs for cancer population.                                                                         |
| Chang Y.D.; Jung J.-W.; Oberoi-Jassal R.; Kim J.; Rajasekhara S.; Haas M.; Smith J.; Desai V.; Donovan K.A.; Portman D. | Edmonton symptom assessment scale and clinical characteristics associated with cannabinoid use in oncology supportive care outpatients                                                                   | JNCCN Journal of the National Comprehensive Cancer Network | 2019           | 17     | 9               | 1059-1064 | <a href="https://dx.doi.org/10.6004/jnccn.2019.7301">https://dx.doi.org/10.6004/jnccn.2019.7301</a>     | No information about AEs for cancer population.                                                                         |
| Ueberall M.A.; Essner U.; Mueller-Schwefe G.H.H.                                                                        | Effectiveness and tolerability of THC:CBD oromucosal spray as add-on measure in patients with severe chronic pain: Analysis of 12-week open-label real-world data provided by the German pain e-registry | Journal of Pain Research                                   | 2019           | 12     | Germany         | 1577-1604 | <a href="https://dx.doi.org/10.2147/JPR.S192174">https://dx.doi.org/10.2147/JPR.S192174</a>             | No information about AEs for cancer population.                                                                         |
| Meten C.M.; Merrien M.; Wasik A.; Sonnevli K.; Junlen H.-R.; Christersson B.; Sander B.; Wahlin B.E.                    | A Clinical Trial of Cannabis As Targeted Therapy for Indolent Leukemic Lymphoma                                                                                                                          | Blood                                                      | 2019           | 134    | Supplement 1    | 5487      | <a href="https://dx.doi.org/10.1182/blood-2019-126693">https://dx.doi.org/10.1182/blood-2019-126693</a> | Meeting abstracts on RCTs/non-RCTs/surveys/case series or case studies with very low quality non-specific AE reporting. |
| Slaven M.; Levine M.; Parpia S.; Shaw E.                                                                                | An approach to dosing: The cannabis oil in pain effectiveness (COPE) trial                                                                                                                               | Medical Cannabis and Cannabinoids                          | 2019           | 2      | 2               | 2         | <a href="https://dx.doi.org/10.1159/000502323">https://dx.doi.org/10.1159/000502323</a>                 | Meeting abstracts on RCTs/non-RCTs/surveys/case series or case studies with very low quality non-specific AE reporting. |
| Dusi V.; Attili S.V.S.; Singaraju M.                                                                                    | Observational study on role of crude cannabis in pain control and quality of life in terminally ill cancer patients: An Indian perspective                                                               | Annals of Oncology                                         | 2019           | 30     | Supplement 9    | ix119     | <a href="https://dx.doi.org/10.1093/annonc/mdz430.005">https://dx.doi.org/10.1093/annonc/mdz430.005</a> | Meeting abstracts on RCTs/non-RCTs/surveys/case series or case studies with very low quality non-specific AE reporting. |
| Stern K.M.; Godbole R.; Ejadi S.; Gallegos N.; Benn B.                                                                  | What CAM it be? a case of metastatic pancreatic adenocarcinoma confounded by complementary and alternative medicine (CAM) therapies                                                                      | American Journal of Respiratory and Critical Care Medicine | 2019           | 199    | 9               |           |                                                                                                         | Meeting abstracts on RCTs/non-RCTs/surveys/case series or case studies with very low quality non-specific AE reporting. |

55. Excluded Articles

| Authors                                                                                                              | Title                                                                                                                                                                         | Journal                                 | Published Year | Volume | Issue | Pages          | DOI                                                                                                                         | Exclusion Reason                                                                                                        |
|----------------------------------------------------------------------------------------------------------------------|-------------------------------------------------------------------------------------------------------------------------------------------------------------------------------|-----------------------------------------|----------------|--------|-------|----------------|-----------------------------------------------------------------------------------------------------------------------------|-------------------------------------------------------------------------------------------------------------------------|
| Macari D.; Gbadamosi B.; Ezekwudo D.; Khoury J.; Jayesimi I.A.; Gaikazian S.S.                                       | Medical cannabis in cancer patients: Prevalence, efficacy, and safety                                                                                                         | Journal of Clinical Oncology            | 2019           |        | 37    | Supplement 15  | <a href="https://dx.doi.org/10.1200/JCO.2019.37.15_suppl.e23099">https://dx.doi.org/10.1200/JCO.2019.37.15_suppl.e23099</a> | Meeting abstracts on RCTs/non-RCTs/surveys/case series or case studies with very low quality non-specific AE reporting. |
| Gamaoun R.; Kasvis P.; Patronidis F.; Arboleda M.F.; Viganò A.                                                       | Potential impact of medical cannabis treatment on common symptoms improvement using the edmonton symptom assessment scale among cancer patients in Quebec-Canada: Pilot study | Supportive Care in Cancer               | 2019           |        | 27    | 1 Supplement   | <a href="https://dx.doi.org/10.1007/s00520-019-04813-1">https://dx.doi.org/10.1007/s00520-019-04813-1</a>                   | Meeting abstracts on RCTs/non-RCTs/surveys/case series or case studies with very low quality non-specific AE reporting. |
| Brodsky A.L.; Gerber D.; Lutz K.; Reese E.; Pothuri B.; Kim A.                                                       | Medical marijuana for palliation of symptoms in women with gynecologic cancers                                                                                                | Gynecologic Oncology                    | 2019           |        | 154   | Supplement 1   | <a href="https://dx.doi.org/10.1016/j.ygyno.2019.04.380">https://dx.doi.org/10.1016/j.ygyno.2019.04.380</a>                 | Meeting abstracts on RCTs/non-RCTs/surveys/case series or case studies with very low quality non-specific AE reporting. |
| Singh V.; Zarrabi A.J.; Welsh J.; Gillespie T.W.; Curseen K.A.; Baer W.; McKenzie-Brown A.M.; Sniecinski R.M.        | General beliefs/perspectives of patients with low-THC oil card regarding marijuana-related products                                                                           | Pain Medicine (United States)           | 2019           |        | 20    | 3              | <a href="https://dx.doi.org/10.1093/pm/ply317">https://dx.doi.org/10.1093/pm/ply317</a>                                     | Meeting abstracts on RCTs/non-RCTs/surveys/case series or case studies with very low quality non-specific AE reporting. |
| Wilson M.; Masterson E.; Broglio K.                                                                                  | Cannabis Use Among Patients Prescribed Opioids in a Palliative Care Clinic (S875)                                                                                             | Journal of Pain and Symptom Management  | 2019           |        | 57    | 2              | <a href="https://dx.doi.org/10.1016/j.jpainsymman.2018.12.325">https://dx.doi.org/10.1016/j.jpainsymman.2018.12.325</a>     | Meeting abstracts on RCTs/non-RCTs/surveys/case series or case studies with very low quality non-specific AE reporting. |
| Arboleda M.F.; Chamberland Prosk E.G.; Viganò A.                                                                     | Medical cannabis oil: Results from the first-in-human phase 1, double-blind, randomized, placebo-controlled study                                                             | Medical Cannabis and Cannabinoids       | 2018           |        | 1     | 2              | <a href="https://dx.doi.org/10.1159/000493905">https://dx.doi.org/10.1159/000493905</a>                                     | No information about AEs for cancer population.                                                                         |
| Blondin N.                                                                                                           | The evolving role of complementary cannabis therapy in glioblastoma treatment                                                                                                 | Neuro-Oncology                          | 2018           |        | 20    | Supplement 6   | <a href="https://dx.doi.org/10.1093/neuonc/noy148">https://dx.doi.org/10.1093/neuonc/noy148</a>                             | Meeting abstracts on RCTs/non-RCTs/surveys/case series or case studies with very low quality non-specific AE reporting. |
| Aggarwal S.; Bhowmick J.; Sharma R.; Singh M.; Gond R.K.; Dash I.; Aggarwal A.                                       | Voice of cancer patients (VoCP): Patient perceptions regarding use of marijuana and its derivatives in cancer                                                                 | Journal of Clinical Oncology            | 2018           |        | 36    | 34 Supplement  | <a href="https://dx.doi.org/10.1200/JCO.2018.36.34_suppl.228">https://dx.doi.org/10.1200/JCO.2018.36.34_suppl.228</a>       | Meeting abstracts on RCTs/non-RCTs/surveys/case series or case studies with very low quality non-specific AE reporting. |
| Bulbut A.; Mino E.A.; Khorsand-Sahbaie M.; Lentkowski L.                                                             | Opioid dose reduction and pain control with medical cannabis                                                                                                                  | Journal of Clinical Oncology            | 2018           |        | 36    | 34 Supplement  | <a href="https://dx.doi.org/10.1200/JCO.2018.36.34_suppl.189">https://dx.doi.org/10.1200/JCO.2018.36.34_suppl.189</a>       | Meeting abstracts on RCTs/non-RCTs/surveys/case series or case studies with very low quality non-specific AE reporting. |
| Temple L.M.; Lampert S.L.                                                                                            | Descriptive study of medical cannabis patients in the Illinois compassionate use of medical cannabis pilot program: Opportunities for improving patient care                  | Global Advances in Health and Medicine  | 2018           |        | 7     | United States  | <a href="https://dx.doi.org/10.1177/2164956118773837">https://dx.doi.org/10.1177/2164956118773837</a>                       | Meeting abstracts on RCTs/non-RCTs/surveys/case series or case studies with very low quality non-specific AE reporting. |
| Arboleda M.-F.; Dam V.; Prosk E.; Dworkind M.; Viganò A.                                                             | Cannabis-Based Medications: The Future Co-analgesics of Choice for Cancer Patients?                                                                                           | Journal of Pain and Symptom Management  | 2018           |        | 56    | 6              | <a href="https://dx.doi.org/10.1016/j.jpainsymman.2018.10.191">https://dx.doi.org/10.1016/j.jpainsymman.2018.10.191</a>     | Meeting abstracts on RCTs/non-RCTs/surveys/case series or case studies with very low quality non-specific AE reporting. |
| Dini E.; Cafalli M.; De Luca C.; Baldacci F.; Gori S.; Bonuccelli U.                                                 | Case report: Chronic migraine successfully treated with cannabinoids                                                                                                          | Journal of Headache and Pain            | 2018           |        | 19    | Supplement 1   | <a href="https://dx.doi.org/10.1186/s10194-018-0900-0">https://dx.doi.org/10.1186/s10194-018-0900-0</a>                     | No information about AEs for cancer population.                                                                         |
| Van Den Hengel-Koot I.S.; Nugteren-Van Lonkhuyzen J.J.; Hondebrink L.; Rietjens S.J.; De Vries I.; Van Riel A.J.H.P. | Unexpected toxicity of cannabidiol (CBD) oil health products                                                                                                                  | Clinical Toxicology                     | 2018           |        | 56    | 6              | <a href="https://dx.doi.org/10.1080/15563650.2018.1457818">https://dx.doi.org/10.1080/15563650.2018.1457818</a>             | No information about AEs for cancer population.                                                                         |
| Mousa A.; Petrovic M.; Laszlo S.; Fleshner N.                                                                        | Is there a therapeutic role for cannabis in advanced prostate cancer? Exploring the patterns and predictors of use among men receiving androgen-deprivation therapy           | Canadian Urological Association Journal | 2018           |        | 12    | 6 Supplement 2 | <a href="https://dx.doi.org/10.1016/j.curo.2018.12.001">https://dx.doi.org/10.1016/j.curo.2018.12.001</a>                   | Meeting abstracts on RCTs/non-RCTs/surveys/case series or case studies with very low quality non-specific AE reporting. |
| Bar-Sela G.; Tauber D.; Mitnik I.; Sheinman-Yuffe H.; Aharon-Peretz J.                                               | Cannabis-related cognitive impairment: Prospective evaluation of possible influences on cancer patients during chemotherapy treatment                                         | Supportive Care in Cancer               | 2018           |        | 26    | 2 Supplement 1 | <a href="https://dx.doi.org/10.1007/s00520-018-4193-2">https://dx.doi.org/10.1007/s00520-018-4193-2</a>                     | Meeting abstracts on RCTs/non-RCTs/surveys/case series or case studies with very low quality non-specific AE reporting. |
| Viganò M.; Arboleda M.F.; Prosk E.; Drozd Y.; Xuecheng L.; Dworkind M.                                               | Cannabis-based medicines show more promise for improving appetite in chronic diseases                                                                                         | Supportive Care in Cancer               | 2018           |        | 26    | 2 Supplement 1 | <a href="https://dx.doi.org/10.1007/s00520-018-4193-2">https://dx.doi.org/10.1007/s00520-018-4193-2</a>                     | Meeting abstracts on RCTs/non-RCTs/surveys/case series or case studies with very low quality non-specific AE reporting. |

55. Excluded Articles

| Authors                                                                                                                                                                                                           | Title                                                                                                                                                                                                                                                          | Journal                                                                | Published Year | Volume | Issue    | Pages                                | DOI                                                                                                           | Exclusion Reason                                                                                                        |
|-------------------------------------------------------------------------------------------------------------------------------------------------------------------------------------------------------------------|----------------------------------------------------------------------------------------------------------------------------------------------------------------------------------------------------------------------------------------------------------------|------------------------------------------------------------------------|----------------|--------|----------|--------------------------------------|---------------------------------------------------------------------------------------------------------------|-------------------------------------------------------------------------------------------------------------------------|
| Arboleda M.F.; Dam V.; Drozd Y.; Prosk E.; Kasvis P.; Dworkind M.; Kilgour R.; Viganò A.                                                                                                                          | Effect of medical cannabis on appetite and weight: A retrospective analysis                                                                                                                                                                                    | Journal of Cachexia, Sarcopenia and Muscle                             | 2018           |        | 9        | 1 205-206                            | <a href="https://dx.doi.org/10.1002/jcsm.12284">https://dx.doi.org/10.1002/jcsm.12284</a>                     | Meeting abstracts on RCTs/non-RCTs/surveys/case series or case studies with very low quality non-specific AE reporting. |
| Polito S.; Dupuis L.L.; Sung L.; Patel P.; Ning W.; Khanna M.                                                                                                                                                     | Nabilone for prevention of acute chemotherapy-induced nausea and vomiting in children: A single centre retrospective review                                                                                                                                    | Canadian Journal of Hospital Pharmacy                                  | 2017           |        | 70       | 1 67                                 |                                                                                                               | Meeting abstracts on RCTs/non-RCTs/surveys/case series or case studies with very low quality non-specific AE reporting. |
| Hansra D.; Granada H.                                                                                                                                                                                             | Evaluation of safety, efficacy, and clinical endpoints of delta-9-tetrahydrocannabinol in patients age 60 or older with hematologic and oncologic malignancies                                                                                                 | Blood                                                                  | 2017           |        | 130      | Supplement 1                         |                                                                                                               | Meeting abstracts on RCTs/non-RCTs/surveys/case series or case studies with very low quality non-specific AE reporting. |
| Short S.C.; Little C.                                                                                                                                                                                             | A 2-part safety and exploratory efficacy randomised double-blind, placebo-controlled study of a 1:1 ratio of cannabidiol and delta-9-tetrahydrocannabinol (CBD: THC) plus dose-intense temozolomide in patients with recurrent glioblastoma multiforme (GBM)   | Neuro-Oncology                                                         | 2017           |        | 19       | Supplement 6 vi13                    | <a href="https://dx.doi.org/10.1093/neuonc/nox168">https://dx.doi.org/10.1093/neuonc/nox168</a>               | Meeting abstracts on RCTs/non-RCTs/surveys/case series or case studies with very low quality non-specific AE reporting. |
| Taha T.; Talhamy S.; Wollner M.; Peer A.; Bar-Seia G.                                                                                                                                                             | The effect of cannabis use on tumor response to nivolumab in patients with advanced malignancies                                                                                                                                                               | Annals of Oncology                                                     | 2017           |        | 28       | Supplement 5 v544                    |                                                                                                               | Meeting abstracts on RCTs/non-RCTs/surveys/case series or case studies with very low quality non-specific AE reporting. |
| Lacey J.                                                                                                                                                                                                          | Prescribing medicinal cannabis for chemotherapy induced nausea and vomiting and refractory advanced cancer related symptoms: A prescribing physician's perspective                                                                                             | Asia-Pacific Journal of Clinical Oncology                              | 2017           |        | 13       | Supplement 4 216                     | <a href="https://dx.doi.org/10.1111/ajco.12799">https://dx.doi.org/10.1111/ajco.12799</a>                     | Meeting abstracts on RCTs/non-RCTs/surveys/case series or case studies with very low quality non-specific AE reporting. |
| Menniti-Ippolito F.; Da Cas R.; Gallo E.; Firenzuoli F.                                                                                                                                                           | Suspected adverse reactions to cannabis gatenic preparations for medical use in Italy                                                                                                                                                                          | Drug Safety                                                            | 2017           |        | 40       | 10 964-965                           | <a href="https://dx.doi.org/10.1007/s40264-017-0580-8">https://dx.doi.org/10.1007/s40264-017-0580-8</a>       | Meeting abstracts on RCTs/non-RCTs/surveys/case series or case studies with very low quality non-specific AE reporting. |
| Hansra D.M.                                                                                                                                                                                                       | Evaluation of safety, efficacy, and other clinical endpoints of delta-9-tetrahydrocannabinol in older patients with hem/onc malignancies                                                                                                                       | Journal of Clinical Oncology                                           | 2017           |        |          | 15 Supplement 35 1                   |                                                                                                               | Meeting abstracts on RCTs/non-RCTs/surveys/case series or case studies with very low quality non-specific AE reporting. |
| Twelves C.; Short S.; Wright S.                                                                                                                                                                                   | A two-part safety and exploratory efficacy randomized double-blind, placebo-controlled study of a 1:1 ratio of the cannabinoids cannabidiol and delta-9-tetrahydrocannabinol (CBD: THC) plus dose-intense temozolomide in patients with recurrent glioblastoma | Journal of Clinical Oncology                                           | 2017           |        |          | 15 Supplement 35 1                   |                                                                                                               | Meeting abstracts on RCTs/non-RCTs/surveys/case series or case studies with very low quality non-specific AE reporting. |
| Krpina K.; Jakopovic M.; Roglic M. Sweeney B.; Talebi S.; Toro D.; Gonzalez K.; Menoscal J.-P.; Shaw R.; Hassen G.W.                                                                                              | Use of alternative therapy in patients with lung cancer<br>Hyperthermia and severe rhabdomyolysis from synthetic cannabinoids                                                                                                                                  | Journal of Thoracic Oncology<br>American Journal of Emergency Medicine | 2017<br>2016   |        | 12<br>34 | 1 Supplement 1 S608-S609<br>1 e1-121 | <a href="https://dx.doi.org/10.1016/j.ajem.2015.05.052">https://dx.doi.org/10.1016/j.ajem.2015.05.052</a>     | No information about AEs for cancer population.                                                                         |
| Luckett T.; Agar M.; Chye R.; Lintzeris N.; McGregor I.; Ailsop D.; Noble B.; Clark K.; Lovell M.; Lee J.; Martin P.; Sheehan C.; Aggarwal R.; Pene C.; Solowij N.; Martin J.; Devilee L.; Currow D.; Phillips J. | Medicinal cannabis use and preferred mode of administration: Preliminary results from an anonymous patient survey to inform medicinal cannabis phase II and III trials for cancer-related anorexia-cachexia                                                    | Palliative Medicine                                                    | 2016           |        | 30       | 6 NP88                               | <a href="https://dx.doi.org/10.1177/0269216316646056">https://dx.doi.org/10.1177/0269216316646056</a>         | Meeting abstracts on RCTs/non-RCTs/surveys/case series or case studies with very low quality non-specific AE reporting. |
| Juarez T.; Piccioni D.; Nguyen A.; Brown B.; Rose L.; Pu M.; Messer K.; Kesari S.                                                                                                                                 | A phase I dose escalation and central nervous system (CNS) pharmacokinetic study of dexamethasone in patients with brain cancer                                                                                                                                | Neuro-Oncology                                                         | 2015           |        | 17       | SUPPL 5 v13                          | <a href="https://dx.doi.org/10.1093/neuonc/nov205.13">https://dx.doi.org/10.1093/neuonc/nov205.13</a>         | Meeting abstracts on RCTs/non-RCTs/surveys/case series or case studies with very low quality non-specific AE reporting. |
| Plummer R.; Anthony A.; Evans J.; Haris N.; D'Archangelo M.; Slater S.; Campbell S.; Brindley C.; Self S.; McKeown P.; Lavin S.; Hynes D.; Flores M.V.; Pedret-Dunn A.; Laffranchi B.                             | A phase I dose escalation study to assess the safety tolerability and pharmacokinetics of ETS2101 in patients (pts) with advanced solid tumours                                                                                                                | European Journal of Cancer                                             | 2015           |        | 51       | SUPPL 3 S58-S59                      |                                                                                                               | Meeting abstracts on RCTs/non-RCTs/surveys/case series or case studies with very low quality non-specific AE reporting. |
| Brunt T.M.; Van Genugten M.; Honer-Snoeken K.; Van De Velde M.J.; Niesink R.J.M.                                                                                                                                  | Therapeutic satisfaction and subjective effects of different strains of pharmaceutical-grade cannabis                                                                                                                                                          | Journal of Clinical Psychopharmacology                                 | 2014           |        | 34       | 3 344-349                            | <a href="https://dx.doi.org/10.1097/JCP.0000000000000129">https://dx.doi.org/10.1097/JCP.0000000000000129</a> | No information about AEs for cancer population.                                                                         |

55. Excluded Articles

| Authors                                                                        | Title                                                                                                                                                                                                                                      | Journal                                                     | Published Year | Volume  | Issue       | Pages     | DOI                                                                                                                       | Exclusion Reason                                                                                                        |
|--------------------------------------------------------------------------------|--------------------------------------------------------------------------------------------------------------------------------------------------------------------------------------------------------------------------------------------|-------------------------------------------------------------|----------------|---------|-------------|-----------|---------------------------------------------------------------------------------------------------------------------------|-------------------------------------------------------------------------------------------------------------------------|
| Notcutt W.; Phillips C.; Hughes J.; Lacoux P.; Vijayakulasingam V.; Baldock L. | A retrospective description of the use of nabilone in UK clinical practice                                                                                                                                                                 | Multiple Sclerosis                                          | 2014           | 20      | 1 SUPPL. 1  | 468       | <a href="https://dx.doi.org/10.1177/1352458514547846">https://dx.doi.org/10.1177/1352458514547846</a>                     | Meeting abstracts on RCTs/non-RCTs/surveys/case series or case studies with very low quality non-specific AE reporting. |
| Elder J.J.; Knoderer H.M.                                                      | Characterization of cannabinoid usage in a pediatric oncology population                                                                                                                                                                   | Pharmacotherapy                                             | 2011           | 31      | 10          | 369e      |                                                                                                                           | Meeting abstracts on RCTs/non-RCTs/surveys/case series or case studies with very low quality non-specific AE reporting. |
| Radiano R.; Or R.; Shouval R.; Mechoulam R.; Abu-Zaid B.                       | Improved symptom management by use of medical cannabis                                                                                                                                                                                     | Bone Marrow Transplantation                                 | 2011           | 46      | SUPPL. 1    | S394-S395 | <a href="https://dx.doi.org/10.1038/bmt.2011.50">https://dx.doi.org/10.1038/bmt.2011.50</a>                               | Meeting abstracts on RCTs/non-RCTs/surveys/case series or case studies with very low quality non-specific AE reporting. |
| Koula-Jenik H.; Holzhauser P.                                                  | Observational study for preventive potential of hempseed oil in capecitabine-induced hand-foot syndrome                                                                                                                                    | Deutsche Zeitschrift fur Onkologie                          | 2010           | 42      | 2           | 80-84     | <a href="https://dx.doi.org/10.1055/s-0029-1242613">https://dx.doi.org/10.1055/s-0029-1242613</a>                         | Non-English language article.                                                                                           |
| Gingerich J.; Wadhwa D.; Lemanski L.; Krahn M.; Daeninck P.J.                  | The use of cannabinoids (CBs) for the treatment of chemotherapy-induced peripheral neuropathy (CIPN): A retrospective review                                                                                                               | Journal of Clinical Oncology                                | 2009           | 27      | 15 SUPPL. 1 | e20743    |                                                                                                                           | Meeting abstracts on RCTs/non-RCTs/surveys/case series or case studies with very low quality non-specific AE reporting. |
| Lynch M.E.; Young J.; Clark A.J.                                               | A Case Series of Patients Using Medicinal Marijuana for Management of Chronic Pain Under the Canadian Marijuana Medical Access Regulations                                                                                                 | Journal of Pain and Symptom Management                      | 2006           | 32      | 5           | 497-501   | <a href="https://dx.doi.org/10.1016/j.jpainsymman.2006.05.016">https://dx.doi.org/10.1016/j.jpainsymman.2006.05.016</a>   | No information about AEs for cancer population.                                                                         |
| Ware M.A.; Adams H.; Guy G.W.                                                  | The medicinal use of cannabis in the UK: Results of a nationwide survey                                                                                                                                                                    | International Journal of Clinical Practice                  | 2005           | 59      | 3           | 291-295   | <a href="https://dx.doi.org/10.1111/j.1742-1241.2004.00271.x">https://dx.doi.org/10.1111/j.1742-1241.2004.00271.x</a>     | No information about AEs for cancer population.                                                                         |
| Grotenhermen F.; Schnelle M.                                                   | Survey on the medical use of Cannabis and THC in Germany                                                                                                                                                                                   | Journal of Cannabis Therapeutics                            | 2003           | 3       | 2           | 17-40     | <a href="https://dx.doi.org/10.1300/J175v03n02_03">https://dx.doi.org/10.1300/J175v03n02_03</a>                           | No information about AEs for cancer population.                                                                         |
| Gallagher R.; Best J.A.; Fyles G.; Hawley P.; Yeomans W.                       | Attitudes and beliefs about the use of Cannabis for symptom control in a palliative population                                                                                                                                             | Journal of Cannabis Therapeutics                            | 2003           | 3       | 2           | 41-50     | <a href="https://dx.doi.org/10.1300/J175v03n02_04">https://dx.doi.org/10.1300/J175v03n02_04</a>                           | No information about AEs for cancer population.                                                                         |
| Perez E.A.; Lembersky B.; Kaywin P.; Kalman L.; Yocom K.; Friedman C.          | Comparable safety and antiemetic efficacy of a brief (30-second bolus) intravenous granisetron infusion and a standard (15-minute) intravenous ondansetron infusion in breast cancer patients receiving moderately emetogenic chemotherapy | Cancer Journal from Scientific American                     | 1998           | 4       | 1           | 52-58     |                                                                                                                           | Wrong intervention (not CBP).                                                                                           |
| Higl M.; Niederte N.; Bremer K.; Schmitt G.; Schmidt C.G.; Seeber S.           | Levonantradol in the treatment of nausea and vomiting caused by cytostatic drugs                                                                                                                                                           | Deutsche Medizinische Wochenschrift                         | 1982           | 107     | 33          | 1232-1234 | <a href="https://dx.doi.org/10.1055/s-2008-1070107">https://dx.doi.org/10.1055/s-2008-1070107</a>                         | Non-English language article.                                                                                           |
| George M.; Pejovic M.H.; Thuaire M.                                            | Randomized trial of nabilone as antiemetic in cancer patients treated with cisplatin                                                                                                                                                       | Biomedicine and Pharmacotherapy                             | 1983           | 37      | 1           | 24-27     |                                                                                                                           | Non-English language article.                                                                                           |
| Heim M.E.; Queisser W.                                                         | Treatment of refractory cancer chemotherapy induces vomiting with the synthetic cannabinoid levonantradol                                                                                                                                  | Onkologie                                                   | 1982           | 5       | 2           | 94-96     |                                                                                                                           | Non-English language article.                                                                                           |
| Broder L.E.; Lean N.L.; Hilsenbeck S.G.                                        | A randomized blinded clinical trial comparing delta-9-tetrahydrocannabinol (THC) and hydroxyzine (HZ) as antiemetics (AE) for cancer chemotherapy (CT)                                                                                     | Proceedings of the American Association for Cancer Research | 1982           | Vol. 23 |             |           | (Broder, Lean, Hilsenbeck) Comprehensive Cancer Cent. State Florida, Univ. Miami Sch. Med., Miami, FL 33136 United States | Meeting abstracts on RCTs/non-RCTs/surveys/case series or case studies with very low quality non-specific AE reporting. |
| Colls B.M.                                                                     | Cytotoxic nausea and cannabinoids                                                                                                                                                                                                          | Lancet                                                      | 1981           |         | 1           | 8224      | 833                                                                                                                       | Hearsay/opinion on AEs.                                                                                                 |
| Kluin-Nelemans J.C.; Meuwissen Th. O.J.A.; Nelemans F.A.; Maes R.A.A.          | DELTA9-Tetrahydrocannabinol (THC) as an anti-emetic in patients treated with cancer chemotherapy. A double-blind cross-over trial against placebo                                                                                          | Netherlands Journal of Medicine                             | 1981           | 24      | 2           |           | 90                                                                                                                        | Meeting abstracts on RCTs/non-RCTs/surveys/case series or case studies with very low quality non-specific AE reporting. |

55. Excluded Articles

| Authors                                                                                                     | Title                                                                                                                                                                                                                                                     | Journal                                                     | Published Year | Volume  | Issue                                                                                                                                                        | Pages    | DOI                | Exclusion Reason                                                                                                        |                                                                                                                         |
|-------------------------------------------------------------------------------------------------------------|-----------------------------------------------------------------------------------------------------------------------------------------------------------------------------------------------------------------------------------------------------------|-------------------------------------------------------------|----------------|---------|--------------------------------------------------------------------------------------------------------------------------------------------------------------|----------|--------------------|-------------------------------------------------------------------------------------------------------------------------|-------------------------------------------------------------------------------------------------------------------------|
| Riggs Jr C.E.; Duffey P.L.; Egorin M.J.; Bachur N.R.                                                        | Influence of delta-9-tetrahydrocannabinol on metabolism and plasma elimination of adriamycin and cyclophosphamide                                                                                                                                         | Proceedings of the American Association for Cancer Research | 1981           | Vol. 22 | (Riggs Jr, Duffey, Egorin, Bachur) Lab. Clin. Biochem., Clin. Oncol. Branch, Baltimore Canc. Res. Program, DCT, NCI, NIH, Baltimore, Md. 21201 United States | C-79     |                    | Meeting abstracts on RCTs/non-RCTs/surveys/case series or case studies with very low quality non-specific AE reporting. |                                                                                                                         |
| Kluin-Nelemans J.C.; Meuwissen Th. O.J.A.; Nelemans F.A.; Maes R.A.A.                                       | Tetrahydrocannabinol as antiemetic in patients treated with cytostatics: double blind crossover trial against placebo                                                                                                                                     | Nederlands Tijdschrift voor Geneeskunde                     | 1981           | 125     |                                                                                                                                                              | 22       | 900-901            | Non-English language article.                                                                                           |                                                                                                                         |
| Colls B.M.                                                                                                  | Cannabis and cancer chemotherapy                                                                                                                                                                                                                          | Lancet                                                      | 1980           |         |                                                                                                                                                              | 1        | 8179               | 1187-1188                                                                                                               | Meeting abstracts on RCTs/non-RCTs/surveys/case series or case studies with very low quality non-specific AE reporting. |
| Chang A.E.; Shiling D.J.; Stillman R.C.                                                                     | A prospective randomized trial of delta-9-tetrahydrocannabinol (THC) as an antiemetic in patients receiving high dose methotrexate (MTX)                                                                                                                  | Proceedings of the American Association for Cancer Research | 1979           | Vol. 20 | (Chang, Shiling, Stillman) Dept. Surg. Branch, Nat. Cancer Inst., Bethesda, Md. 20014 United States                                                          | No.-357  |                    | Meeting abstracts on RCTs/non-RCTs/surveys/case series or case studies with very low quality non-specific AE reporting. |                                                                                                                         |
| Frytak S.; Moertel C.G.; O'Fallon J.R.                                                                      | A comparison of delta-9-tetrahydrocannabinol (THC), prochlorperazine (PCP) and placebo as antiemetics for cancer chemotherapy                                                                                                                             | Proceedings of the American Association for Cancer Research | 1979           | Vol. 20 | (Frytak, Moertel, O'Fallon) Mayo Clin., Rochester, Minn. 55901 United States                                                                                 | No.C-414 |                    | Meeting abstracts on RCTs/non-RCTs/surveys/case series or case studies with very low quality non-specific AE reporting. |                                                                                                                         |
| Sallan S.; Zinberg N.; Frei E.                                                                              | Oral delta 9 tetrahydrocannabinol (THC) in the prevention of vomiting (V) associated with cancer chemotherapy (CC)                                                                                                                                        | Proceedings of the American Association for Cancer Research | 1975           | 16      |                                                                                                                                                              | 66       | No.-575            | Meeting abstracts on RCTs/non-RCTs/surveys/case series or case studies with very low quality non-specific AE reporting. |                                                                                                                         |
| Kluin-Nelemans, J.C.; Meuwissen Th., O.J.A.; Nelemans, F.A.; Maes, R.A.A.                                   | Δ <sup>9</sup> -Tetrahydrocannabinol (THC) as an anti-emetic in patients treated with cancer chemotherapy. A double-blind cross-over trial against placebo                                                                                                | NETH. J. MED.                                               | 1981           | 24      |                                                                                                                                                              | 2        | 90                 | Meeting abstracts on RCTs/non-RCTs/surveys/case series or case studies with very low quality non-specific AE reporting. |                                                                                                                         |
| WONGKONGDECH, Rane; PANSILA, Narisara; NONETOOM, Pichit; TURNBULL, Niruwan; WONGKONGDECH, Adisorn           | Symptom Management and Quality of Life of Palliative Cancer Patients After Being Administered with Thai Medicinal Cannabis ...International Conference on Informatics, Management, and Technology in Healthcare (ICIMTH), 1-3 July, 2022, Athens, Greece. | Studies in Health Technology & Informatics                  | 2022           | 295     |                                                                                                                                                              | 450-453  | 10.3233/SHTI220762 | No information about AEs for cancer population.                                                                         |                                                                                                                         |
| Wolfe, Joanne; Bluebond-Langner, Myra; Doherty, Megan; Power, Liam; Attala, Monica; Vadeboncoeur, Christina | Use of oral cannabis extracts in the pediatric palliative care setting: A retrospective chart review.                                                                                                                                                     | Palliative Medicine                                         | 2020           | 34      |                                                                                                                                                              | 3        | 435-437            | 10.1177/0269216320904315                                                                                                | No information about AEs for cancer population.                                                                         |
| RICHARDSON, PAMELA                                                                                          | The Case of the Cannabis Conundrum.                                                                                                                                                                                                                       | ONS Connect                                                 | 2014           | 29      |                                                                                                                                                              | 4        |                    | 11-Nov                                                                                                                  | No information about AEs for cancer population.                                                                         |
|                                                                                                             | Clinical digest. Marijuana use linked to the worst prognoses of testicular cancer.                                                                                                                                                                        | Nursing Standard                                            | 2012           | 27      |                                                                                                                                                              | 6        | 15-15              | 10.7748/ns.27.6.15.s23                                                                                                  | Wrong concept (study reporting/evaluating the risk of developing cancer associated with CBP use in other populations).  |
| Silman, YS; Eshet, L; Kennett, R; ben Ami, S                                                                | THE EFFECT OF CANNABIS CONSUMPTION ON IMMUNE RELATED ADVERSE EVENTS IN MELANOMA PATIENTS TREATED WITH IPILIMUMAB NIVOLUMAB COMBINATION THERAPY                                                                                                            | ONCOLOGY NURSING FORUM                                      | 2021           | 48      |                                                                                                                                                              | 2        |                    | Meeting abstracts on RCTs/non-RCTs/surveys/case series or case studies with very low quality non-specific AE reporting. |                                                                                                                         |

55. Excluded Articles

| Authors                                                                                             | Title                                                                                                                                         | Journal                                 | Published Year | Volume | Issue | Pages        | DOI                              | Exclusion Reason                                |
|-----------------------------------------------------------------------------------------------------|-----------------------------------------------------------------------------------------------------------------------------------------------|-----------------------------------------|----------------|--------|-------|--------------|----------------------------------|-------------------------------------------------|
| Stith, SS; Vigil, JM; Brockelman, F; Keeling, K; Hall, B                                            | The Association between Cannabis Product Characteristics and Symptom Relief                                                                   | SCIENTIFIC REPORTS                      | 2019           |        | 9     |              | 10.1038/s41598-019-39462-1       | No information about AEs for cancer population. |
| Guide, JG; Navone, CCO; Perez, MDR; Gonzalez, ALC; Ramos, PMV                                       | Medical cannabis as a therapeutic resource: preliminary study                                                                                 | REVISTA MEDICA DEL URUGUAY              | 2019           | 35     | 4     | 289-297      | 10.29193/RMU.35.4.5              | Non-English language article.                   |
| Gschiel, B; Likar, R                                                                                | Cannabinoids in Palliative Symptom Control                                                                                                    | ZEITSCHRIFT FUR PALLIATIVMEDIZIN        | 2009           |        | 10    | 1 45-50      | 10.1055/s-0028-1090169           | Non-English language article.                   |
| Likar, R; Pipam, W; Kostenberger, M; Neuwersch, S                                                   | Cannabinoids in Clinical Practice Dronabinol for the Treatment of Therapy-Resistant Nausea and Vomiting of Cancer Patients in Palliative Care | ZEITSCHRIFT FUR PALLIATIVMEDIZIN        | 2017           |        | 18    | 5 249-254    | 10.1055/s-0043-109511            | Non-English language article.                   |
| Lutoti, S; Kagwa, B; Kamba, PF; Mukonzo, J; Sesaazi, CD; Katuura, E                                 | Ethnobotanical Survey of Medicinal Plants Used in Breast Cancer Treatment by Traditional Health Practitioners in Central Uganda               | JOURNAL OF MULTIDISCIPLINARY HEALTHCARE | 2023           |        | 16    | 635-651      | 10.2147/JMDH.S387256             | No information about AEs for cancer population. |
| Stith, SS; Li, XX; Orozco, J; Lopez, V; Brockelman, F; Keeling, K; Hall, B; Vigil, JM               | The Effectiveness of Common Cannabis Products for Treatment of Nausea                                                                         | JOURNAL OF CLINICAL GASTROENTEROLOGY    | 2022           |        | 56    | 4 331-338    | 10.1097/MCG.0000000000001534     | No information about AEs for cancer population. |
| Casarett, DJ; Beliveau, JN; Arbus, MS                                                               | Benefit of Tetrahydrocannabinol versus Cannabidiol for Common Palliative Care Symptoms                                                        | JOURNAL OF PALLIATIVE MEDICINE          | 2019           |        | 22    | 10 1180-1184 | 10.1089/jpm.2018.0658            | No information about AEs for cancer population. |
| Butler, TW; Hande, K; Ryan, M; Raman, R; McDowell, MR; Cones, B; Jackson, HJ; Cortez, M; Murphy, BA | Cannabidiol Knowledge, beliefs, and experiences of patients with cancer                                                                       | CLINICAL JOURNAL OF ONCOLOGY NURSING    | 2021           |        | 25    | 4 405-412    | 10.1188/21.CJON.405-412          | No information about AEs for cancer population. |
| Kaar, SJ; Gao, CX; Lloyd, B; Smith, K; Lubman, DI                                                   | Trends in cannabis-related ambulance presentations from 2000 to 2013 in Melbourne, Australia                                                  | DRUG AND ALCOHOL DEPENDENCE             | 2015           |        | 155   | 24-30        | 10.1016/j.drugalcdep.2015.08.021 | No information about AEs for cancer population. |
